# Supplementary material for: Copper-catalyzed trifluoromethylation of organic zinc reagents with an electrophilic trifluoromethylating reagent
Source: Royal Society of Chemistry journal article supplement (doi:10.1039/c5ra02279g), 2015-01-01
Supplement: c5ra02279g1.pdf [file c5ra02279g1.pdf]

## Copper-Catalyzed Trifluoromethylation of Organic Zinc Reagents with Electrophilic Trifluoromethylating Reagent

Chang-Sheng Wang,<sup>†</sup> Haoyang Wang,<sup>§</sup> Cheng Yao,<sup>†,\*</sup>

<sup>†</sup> College of Science, Nanjing Tech University, 30 Puzhu South Road, Nanjing 211816, China

e-mail: yaochengnjut@126.com, yaocheng@njtech.edu.cn

<sup>§</sup> Shanghai Institute of Organic Chemistry, Chinese Academy of Sciences, 345 Lingling Road,  
Shanghai 200032, China

### Supporting Information

#### Contents:

|                                                                                                                            |     |
|----------------------------------------------------------------------------------------------------------------------------|-----|
| General Information.....                                                                                                   | S2  |
| General Procedure for Copper-Catalyzed Trifluoromethylation of Zinc<br>Reagents.....                                       | S3  |
| Mechanistic Experiments Section.....                                                                                       | S14 |
| Copies of the <sup>1</sup> H, <sup>19</sup> F and <sup>13</sup> C NMR Spectra of Compounds <b>4a-m</b> , <b>1b-e</b> ..... | S20 |
| X-Ray Diffraction data of Single Crystal of bimetallic copper(II) species<br><b>8</b> .....                                | S43 |

**General information.** All solvents were purified by standard method.  $^1\text{H}$  NMR,  $^{19}\text{F}$  NMR spectra and  $^{13}\text{C}$  NMR were recorded on 400 MHz, 376 MHz and 101 MHz spectrometer, respectively.  $^1\text{H}$  NMR and  $^{13}\text{C}$  NMR chemical shifts were determined relative to internal standard TMS at  $\delta$  0.0 ppm and  $^{19}\text{F}$  NMR chemical shifts were determined relative to  $\text{CFCl}_3$  as internal standard. Chemical shifts ( $\delta$ ) are reported in ppm, and coupling constants ( $J$ ) are in Hertz (Hz). The following abbreviations were used to explain the multiplicities: s = singlet, d = doublet, t = triplet, q = quartet, m = multiplet, br = broad. All reactions were monitored by TLC or  $^{19}\text{F}$  NMR. Flash column chromatograph was carried out using 300-400 mesh silica gel at medium pressure.

**Materials.** All reagents were received from commercial sources. Pure CuI was freshly prepared under the condition of the reference (Dieter, R. K. *J. Am. Chem. Soc.* **1985**, *107*, 4679). Solvents were freshly dried and degassed according to the purification handbook Purification of Laboratory Chemicals before using.

### **General Procedure for the Preparation of Zinc Reagent.**

Anhydrous LiCl (381 mg, 9.0 mmol) was placed in an argon-flushed flask and dried 30 min at 150 °C under vacuum (1 mbar). Zinc powder (13.5 mmol, 883 mg, 1.5 equiv, 150 mesh, Chemetall, 99.9 % or 325 mesh, Strem, 99.9 %); in the case of active sensitive substrates 1.4 equiv) was added under Ar and heterogeneous mixture of Zn and LiCl was dried again for 30 min at 150 °C under vacuum (1 mbar). The reaction flask was cooled to room temperature and then evacuated and refilled with argon three times. THF (10 mL) was added and Zn was activated by BrCH<sub>2</sub>CH<sub>2</sub>Br (5.0 mol %) and Me<sub>3</sub>SiCl (1.0 mol %). The aryl iodide or aryl bromide (9 mmol) was added neat at the room temperature. The reaction mixture was stirred at 50 °C. The completion of the insertion reaction was checked by GC analysis of reaction aliquots quenched with a solution of NH<sub>4</sub>Cl in water (the conversion was more than 96%). An aliquot of organozinc reagent (1.0 mL) was titrated using iodine. The titrated organozinc reagent solution in THF (9.0 mL) were carefully separated from the remaining zinc powder using a syringe and transferred to another dry and argon-flushed flask.

**Reference:** Krasovskiy, A.; Knochel, P. *Angew. Chem. Int. Ed.* **2006**, *45*, 6040.

### **General procedure for Copper-Catalyzed Trifluoromethylation of Organic Zinc Reagents with Electrophilic Trifluoromethylating Reagent**

Freshly prepared CuI (28 mg, 0.15 mmol), Togni's reagent II (474 mg, 1.5 mmol) and anhydrous DMF (5.0 mL) were placed into an oven-dried Schlenk tube that is equipped with a stirring bar under argon, after that organozinc reagents in THF (0.5 mmol, 0.3 M, 1.65 mL) was then added dropwise. The reaction was stirred at room temperature and monitored by <sup>19</sup>F NMR spectroscopy until the disappearance of Togni's reagent II (typically 20 minute). 25 mL of Distilled water and 10 mL of Et<sub>2</sub>O was added and the organic phase was separated. The aqueous phase was extracted with Et<sub>2</sub>O (3 x 10 mL) and the combined organic extracts were dried over anhydrous Na<sub>2</sub>SO<sub>4</sub>, and concentrated in *vacuo*. The product was purified by flash chromatography on silica gel with pentane and further purified by preparation TLC.

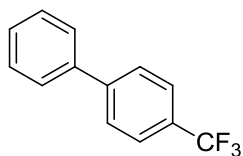

**4-(Trifluoromethyl)-1,1'-biphenyl (4a).** Freshly prepared CuI (28 mg, 0.15 mmol), Togni's reagent II (474 mg, 1.50 mmol) and anhydrous DMF (5.0 mL) were placed into an oven-dried Schlenk tube that is equipped with a stirring bar under Ar. Organozinc reagents (0.5 mmol) was then added dropwise. The reaction was stirred at room temperature until the disappearance of Togni's reagent II (typically 20 min as monitored by  $^{19}\text{F}$  NMR spectroscopy). The product was purified by flash chromatography on silica gel with pentane and isolated as a white solid in 64% yield (71 mg).  $^1\text{H}$  NMR (400 MHz,  $\text{CDCl}_3$ )  $\delta$  7.70 (d,  $J = 1.2$  Hz, 4 H), 7.60 (d,  $J = 8.1$  Hz, 2 H), 7.48 (t,  $J = 7.4$  Hz, 2 H), 7.41 (t,  $J = 7.3$  Hz, 1 H);  $^{13}\text{C}$  NMR (101 MHz,  $\text{CDCl}_3$ )  $\delta$  144.7, 139.7, 129.0, 128.2, 127.4, 127.3, 125.7, 125.7, 121.6 (q,  $J = 271.7$  Hz);  $^{19}\text{F}$  NMR (376 MHz,  $\text{CDCl}_3$ )  $\delta$  -62.42 (s, 3 F) ppm. MS (EI)  $m/z$  (%): 222 (100).

**Reference:** Chu, L.-L.; Qing, F.-L. *Org. Lett.* **2010**, *12*, 5060.

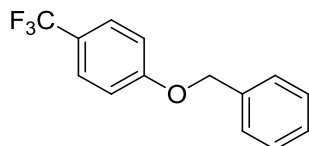

**1-(Benzyloxy)-4-(trifluoromethyl)benzene (4b).** Freshly prepared CuI (28 mg, 0.15 mmol), Togni's reagent II (474 mg, 1.50 mmol) and anhydrous DMF (5.0 mL) were placed into an oven-dried Schlenk tube that is equipped with a stirring bar under Ar. Organozinc reagents (0.5 mmol) was then added dropwise. The reaction was stirred at room temperature until the disappearance of Togni's reagent II (typically 20 min as monitored by  $^{19}\text{F}$  NMR spectroscopy). The product was purified by flash chromatography on silica gel with pentane and isolated as a white solid in 54% yield (68 mg).  $^1\text{H}$  NMR (400 MHz,  $\text{CDCl}_3$ )  $\delta$  7.54 (d,  $J = 8.5$  Hz, 2 H), 7.41 (t,  $J = 7.9$  Hz, 4 H), 7.35 (t,  $J = 6.9$  Hz, 1 H), 7.03 (d,  $J = 8.5$  Hz, 2 H), 5.11 (s, 2 H);  $^{13}\text{C}$  NMR (101 MHz,  $\text{CDCl}_3$ )  $\delta$  161.1, 136.2, 128.7, 128.3, 127.5, 127.0 (d,  $J = 3.7$  Hz), 124.4 (q,  $J = 271.1$  Hz), 122.7 (d,  $J = 32.8$  Hz), 114.8, 70.1;  $^{19}\text{F}$  NMR (376 MHz,  $\text{CDCl}_3$ )  $\delta$  -61.56 (s, 3 F) ppm. MS (EI)  $m/z$  (%): 252.1, 91.1(100).

**Reference:** Gamido, E. M.; Gamido, J.; Calheiros, R.; Marques, M.; Borges, F. J. *Phys.Chem. A* **2009**, *113*, 9934.

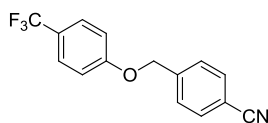

**4-((4-(Trifluoromethyl)phenoxy)methyl)benzonitrile (4c).** Freshly prepared CuI (28 mg, 0.15 mmol), Togni's reagent II (474 mg, 1.50 mmol) and anhydrous DMF (5.0 mL) were placed into an oven-dried Schlenk tube that is equipped with a stirring bar under Ar. Organozinc reagents (0.5 mmol) was then added dropwise. The reaction was stirred at room temperature until the disappearance of Togni's reagent II (typically 20 min as monitored by  $^{19}\text{F}$  NMR spectroscopy). The product was purified by flash chromatography on silica gel with pentane and isolated as a white solid in 32% yield (44 mg).  $^1\text{H}$  NMR (400 MHz,  $\text{CDCl}_3$ )  $\delta$  7.67 (d,  $J = 8.2$  Hz, 2 H), 7.55 (d,  $J = 8.0$  Hz, 2 H), 7.31 (d,  $J = 8.0$  Hz, 2 H), 6.96 (d,  $J = 6.3$  Hz, 2 H), 5.13 (s, 2 H);  $^{13}\text{C}$  NMR (101 MHz,  $\text{CDCl}_3$ )  $\delta$  158.2, 142.7, 132.4, 129.7, 128.6 (q,  $J = 282.4$  Hz), 127.6, 121.5, 118.9, 114.8, 111.7, 68.6;  $^{19}\text{F}$  NMR (376 MHz,  $\text{CDCl}_3$ )  $\delta$  -61.67 (s, 3 F) ppm. MS (EI)  $m/z$ (%) 277.1, 116.1(100). HRMS (EI) Calcd for:  $\text{C}_{15}\text{H}_{10}\text{F}_3\text{NO}$ : 277.0714; Found: 277.0719. IR (thin film):  $\nu_{\text{max}}$  3059, 2228, 1611, 1600, 1586, 1497, 1485, 1450, 1377, 1311, 1244, 1078, 1054, 823, 752, 687, 549  $\text{cm}^{-1}$ . Mp: 58-60  $^{\circ}\text{C}$

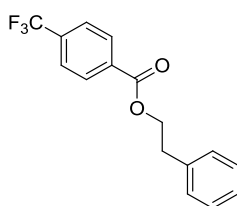

**Phenethyl 4-(trifluoromethyl)benzoate (4d).** Freshly prepared CuI (28 mg, 0.15 mmol), Togni's reagent II (474 mg, 1.50 mmol) and anhydrous DMF (5.0 mL) were placed into an oven-dried Schlenk tube that is equipped with a stirring bar under Ar. Organozinc reagents (0.5 mmol) was then added dropwise. The reaction was stirred at room temperature until the disappearance of Togni's reagent II (typically 20 min as monitored by  $^{19}\text{F}$  NMR spectroscopy). The product was purified by flash chromatography on silica gel with pentane and isolated as a colorless liquid in 65%

yield (95 mg).  $^1\text{H}$  NMR (400 MHz,  $\text{CDCl}_3$ )  $\delta$  8.11 (d,  $J = 8.1$  Hz, 2 H), 7.69 (d,  $J = 8.1$  Hz, 2 H), 7.32 (d,  $J = 7.1$  Hz, 2 H), 7.27 (m, 3 H), 4.57 (t,  $J = 7.0$  Hz, 2 H), 3.09 (t,  $J = 6.9$  Hz, 2 H);  $^{13}\text{C}$  NMR (101 MHz,  $\text{CDCl}_3$ )  $\delta$  165.4, 137.7, 132.4 (d,  $J = 246.9$  Hz, 0H), 130.1, 129.1, 128.6, 126.9, 125.6, 125.5, 123.8 (q,  $J = 272.8$  Hz), 66.1, 35.3;  $^{19}\text{F}$  NMR (376 MHz,  $\text{CDCl}_3$ )  $\delta$  -63.18 (s, 3 F) ppm. MS (EI)  $m/z$ (%) 293.1( $\text{M}^+-1$ ), 104.1(100). HRMS (EI) Calcd for:  $\text{C}_{16}\text{H}_{13}\text{F}_3\text{O}_2$  ( $\text{M}^+-1$ ): 293.0789; Found: 293.0790. IR (thin film):  $\nu_{\text{max}}$  3066, 2960, 1724, 1497, 1513, 1412, 1326, 1311, 1275, 1169, 1128, 1066, 1018, 775, 749, 700  $\text{cm}^{-1}$ .

**Reference:** Zhang, C.; Feng, P.; Jiao, N. *J. Am. Chem. Soc.* **2013**, *135*, 15257.

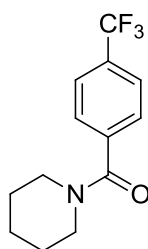

**Piperidin-1-yl(4-(trifluoromethyl)phenyl)methanone (4e).** Freshly prepared CuI (28 mg, 0.15 mmol), Togni's reagent II (474 mg, 1.50 mmol) and anhydrous DMF (5.0 mL) were placed into an oven-dried Schlenk tube that is equipped with a stirring bar under Ar. Organozinc reagents (0.5 mmol) was then added dropwise. The reaction was stirred at room temperature until the disappearance of Togni's reagent II (typically 20 min as monitored by  $^{19}\text{F}$  NMR spectroscopy). The product was purified by flash chromatography on silica gel with pentane. The compound was further purified by prep-HPLC with a C18 column (Kineten,  $4.6 \times 100$  mm, 2.6  $\mu\text{m}$ ) using a water-acetonitrile mixed solvent as the eluent ( $\text{CH}_3\text{CN} : \text{H}_2\text{O} = 50 : 50$ , flow = 1.8 mL/min, 250/220 nm) to give the titled compound as a white solid in 60% yield (77 mg).  $^1\text{H}$  NMR (500 MHz,  $\text{CDCl}_3$ )  $\delta$  7.67 (d,  $J = 8.0$  Hz, 2 H), 7.51 (d,  $J = 7.9$  Hz, 2 H), 3.73 (s, 2 H), 3.30 (s, 2 H), 1.70 (s, 4 H), 1.53 (s, 2 H).  $^{13}\text{C}$  NMR (101 MHz,  $\text{CDCl}_3$ )  $\delta$  168.8, 140.0, 131.4 (q,  $J = 32.7$  Hz), 127.1, 125.5 (q,  $J = 3.7$  Hz), 123.8 (q,  $J = 272.3$  Hz), 48.7, 43.2, 26.5, 25.5, 24.5;  $^{19}\text{F}$  NMR (376 MHz,  $\text{CDCl}_3$ )  $\delta$  -62.90 (s, 3 F) ppm. MS (EI)  $m/z$  (%) 255.9 (100).

**Reference:** Wang, X.; Wang, J.-B. *J. Am. Chem. Soc.* **2013**, *135*, 10330.

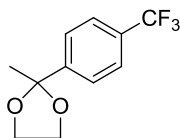

**2-Methyl-2-(4-(trifluoromethyl)phenyl)-1,3-dioxolane (4f).** Freshly prepared CuI (28 mg, 0.15 mmol), Togni's reagent II (474 mg, 1.50 mmol) and anhydrous DMF (5.0 mL) were placed into an oven-dried Schlenk tube that is equipped with a stirring bar under Ar. Organozinc reagents (0.5 mmol) was then added dropwise. The reaction was stirred at room temperature until the disappearance of Togni's reagent II (typically 20 min as monitored by  $^{19}\text{F}$  NMR spectroscopy). The product was purified by flash chromatography on silica gel with pentane and isolated as a white solid in 67% yield (78 mg).  $^1\text{H}$  NMR (400 MHz,  $\text{CDCl}_3$ )  $\delta$  7.67 (d,  $J = 8.3$  Hz, 2 H), 7.22 (d,  $J = 8.4$  Hz, 2 H), 4.02 (t,  $J = 6.8$  Hz, 2 H), 3.74 (t,  $J = 6.9$  Hz, 2 H), 1.61 (s, 3 H);  $^{13}\text{C}$  NMR (101 MHz,  $\text{CDCl}_3$ )  $\delta$  143.3, 137.4, 127.5, 126.7 (q,  $J = 258.1$  Hz), 108.6, 93.8, 64.6, 27.7, 27.6;  $^{19}\text{F}$  NMR (376 MHz,  $\text{CDCl}_3$ )  $\delta$  -62.54 (s, 3 F) ppm. MS (EI)  $m/z$  (%) 232.1 (100).

**Reference:** Kondolff, I.; Doucet, H.; Santelli, M. *Eur. J. Org. Chem.* **2006**, 3, 765.

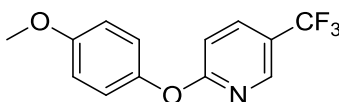

**2-(4-Methoxyphenoxy)-5-(trifluoromethyl)pyridine(4g).** Freshly prepared CuI (28 mg, 0.15 mmol), Togni's reagent II (474 mg, 1.50 mmol) and anhydrous DMF (5.0 mL) were placed into an oven-dried Schlenk tube that is equipped with a stirring bar under Ar. Organozinc reagents (0.5 mmol) was then added dropwise. The reaction was stirred at room temperature until the disappearance of Togni's reagent II (typically 20 min as monitored by  $^{19}\text{F}$  NMR spectroscopy). The product was purified by flash chromatography on silica gel with pentane and isolated as a light yellow liquid in 68% yield (91 mg).  $^1\text{H}$  NMR (400 MHz,  $\text{CDCl}_3$ )  $\delta$  8.44 (d,  $J = 1.4$  Hz, 1 H), 7.87 (dd,  $J = 8.7, 2.3$  Hz, 1 H), 7.09 – 7.04 (m, 2 H), 6.99 – 6.92 (m, 3 H), 3.82 (s, 3 H);  $^{13}\text{C}$  NMR (101 MHz,  $\text{CDCl}_3$ )  $\delta$  166.2, 157.0, 146.4, 145.4 (dd,  $J = 8.4, 4.1$  Hz), 136.6 (d,  $J = 3.0$  Hz), 126.4 (q,  $J = 271.3$  Hz), 122.4, 121.2 (q,  $J = 33.2$  Hz), 114.8, 111.0, 55.5;  $^{19}\text{F}$  NMR (376 MHz,  $\text{CDCl}_3$ )  $\delta$  -61.68 (s, 3 F) ppm. MS (EI)  $m/z$  (%) 269.1

(100). HRMS (EI) Calcd for: C<sub>13</sub>H<sub>10</sub>F<sub>3</sub>NO<sub>2</sub>: 269.0664; Found: 269.0661. IR (thin film):  $\nu_{\max}$  3070, 2935, 2838, 1616, 1508, 1487, 1442, 1397, 1327, 1286, 1244, 1196, 1127, 1078, 1036, 835, 819 cm<sup>-1</sup>.

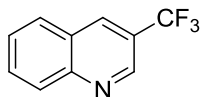

**3-(Trifluoromethyl)quinoline (4h).** Freshly prepared CuI (28 mg, 0.15 mmol), Togni's reagent II (474 mg, 1.50 mmol) and anhydrous DMF (5.0 mL) were placed into an oven-dried Schlenk tube that is equipped with a stirring bar under Ar. Organozinc reagents (0.5 mmol) was then added dropwise. The reaction was stirred at room temperature until the disappearance of Togni's reagent II (typically 20 min as monitored by <sup>19</sup>F NMR spectroscopy). The product was purified by flash chromatography on silica gel with pentane and isolated as a colorless liquid in 60% yield (59 mg). <sup>1</sup>H NMR (400 MHz, CDCl<sub>3</sub>)  $\delta$  9.09 (s, 1 H), 8.44 (s, 1 H), 8.18 (d, *J* = 8.5 Hz, 1 H), 7.91 (d, *J* = 8.1 Hz, 1 H), 7.85 (t, *J* = 7.6 Hz, 1 H), 7.66 (t, *J* = 7.5 Hz, 1 H); <sup>19</sup>F NMR (376 MHz, CDCl<sub>3</sub>)  $\delta$  -61.83 (s, 3 F); <sup>13</sup>C NMR (101 MHz, CDCl<sub>3</sub>)  $\delta$  149.3, 146.0 (d, *J* = 3.0 Hz), 133.9 (q, *J* = 2.2 Hz), 131.7, 130.0, 128.6, 128.0, 126.2, 123.6 (q, *J* = 272.3 Hz), 123.6 (q, *J* = 33.0 Hz) ppm. MS (EI) *m/z* (%): 197.1(100).

**Reference:** Jiang, X.-L.; Qing, F.-L. *J. Org. Chem.* **2012**, *77*, 1251

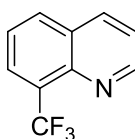

**8-(Trifluoromethyl)quinoline (4i).** Freshly prepared CuI (28 mg, 0.15 mmol), Togni's reagent II (474 mg, 1.50 mmol) and anhydrous DMF (5.0 mL) were placed into an oven-dried Schlenk tube that is equipped with a stirring bar under Ar. Organozinc reagents (0.5 mmol) was then added dropwise. The reaction was stirred at room temperature until the disappearance of Togni's reagent II (typically 20 min as monitored by <sup>19</sup>F NMR spectroscopy). The product was purified by flash chromatography on silica gel with pentane and isolated as a light yellow liquid in 53% yield (52 mg). <sup>1</sup>H NMR (400 MHz, CDCl<sub>3</sub>)  $\delta$  9.07 (dd, *J* = 4.1, 1.6 Hz, 1 H), 8.21 (dd,



$J = 8.3, 1.6$  Hz, 1 H), 8.07 (d,  $J = 7.2$  Hz, 1 H), 8.00 (d,  $J = 8.2$  Hz, 1 H), 7.58 (t,  $J = 7.8$  Hz, 1 H), 7.50 (dd,  $J = 8.3, 4.2$  Hz, 1 H);  $^{13}\text{C}$  NMR (101 MHz,  $\text{CDCl}_3$ )  $\delta$  151.2, 144.7, 136.2, 132.4, 128.6, 128.0 (q,  $J = 5.7$  Hz), 127.8 (q,  $J = 29.2$  Hz), 125.2, 124.1 (q,  $J = 273.4$  Hz), 121.9;  $^{19}\text{F}$  NMR (376 MHz,  $\text{CDCl}_3$ )  $\delta$  -60.26 (s, 3 F) ppm. MS (EI)  $m/z(\%)$ : 197.1(100).

**Reference:** Dai, J.-J.; Fu, Y. *J. Am. Chem. Soc.* **2013**, *135*, 8436.

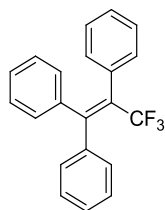

**(3,3,3-Trifluoroprop-1-ene-1,1,2-triyl)tribenzene (4j).** Freshly prepared CuI (28 mg, 0.15 mmol), Togni's reagent II (474 mg, 1.50 mmol) and anhydrous DMF (5.0 mL) were placed into an oven-dried Schlenk tube that is equipped with a stirring bar under Ar. Organozinc reagents (0.5 mmol) was then added dropwise. The reaction was stirred at room temperature until the disappearance of Togni's reagent II (typically 20 min as monitored by  $^{19}\text{F}$  NMR spectroscopy). Yields were determined by  $^{19}\text{F}$  NMR analysis of the crude product using *p*-Fluorotoluene as an internal standard in 57% yield.  $^{19}\text{F}$  NMR (376 MHz,  $\text{CDCl}_3$ )  $\delta$  -55.62 (s, 3 F) ppm. MS (EI)  $m/z$  (%) 324.2 (100). HRMS (EI) Calcd for:  $\text{C}_{21}\text{H}_{15}\text{F}_3$  ( $\text{M}^+$ ): 324.1126; Found: 324.1131.

**Reference:** Liu, X.; Shimizu, M.; Hiyama, T. *Angew. Chem. Int. Ed.* **2004**, *43*, 879.

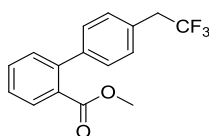

**Methyl 4'-(2,2,2-trifluoroethyl)-[1,1'-biphenyl]-2-carboxylate(4k).** Freshly prepared CuI (28 mg, 0.15 mmol), Togni's reagent II (474 mg, 1.50 mmol) and anhydrous DMF (5.0 mL) were placed into an oven-dried Schlenk tube that is equipped with a stirring bar under Ar. Organozinc reagents (0.5 mmol) was then added dropwise. The reaction was stirred at room temperature until the disappearance of Togni's reagent II (typically 20 min as monitored by  $^{19}\text{F}$  NMR spectroscopy). The

product was purified by flash chromatography on silica gel with pentane and isolated as a white solid in 56% yield (82 mg).  $^1\text{H}$  NMR (400 MHz,  $\text{CDCl}_3$ )  $\delta$  7.84 (d,  $J = 7.8$  Hz, 1 H), 7.54 (t,  $J = 7.5$  Hz, 1 H), 7.42 (t,  $J = 7.6$  Hz, 1 H), 7.37 (d,  $J = 7.7$  Hz, 1 H), 7.31 (dd,  $J = 8.1$  Hz, 4 H), 3.63 (s, 3 H), 3.41 (q,  $J = 10.8$  Hz, 2 H);  $^{13}\text{C}$  NMR (101 MHz,  $\text{CDCl}_3$ )  $\delta$  168.8, 141.9, 141.2, 131.4, 130.9, 130.7, 129.9, 129.8, 129.0, 128.6, 127.4, 125.8 (q,  $J = 276.6$  Hz), 51.9, 40.0 (q,  $J = 29.8$  Hz).  $^{19}\text{F}$  NMR (376 MHz,  $\text{CDCl}_3$ )  $\delta$  -65.88 (t,  $J = 10.8$  Hz, 3 F) ppm. MS (EI)  $m/z$  (%) 294.1, 263.1 (100). HRMS (EI) Calcd for:  $\text{C}_{16}\text{H}_{13}\text{F}_3\text{O}_2$ : 294.0868; Found: 294.0870. IR (thin film):  $\nu_{\text{max}}$  3063, 2958, 2928, 1720, 1596, 1436, 1260, 1132, 809, 762, 725, 708, 664, 652  $\text{cm}^{-1}$ . Mp: 70-72  $^\circ\text{C}$ .

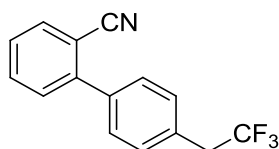

**4'-(2,2,2-Trifluoroethyl)-[1,1'-biphenyl]-2-carbonitrile (41).** Freshly prepared CuI (28 mg, 0.15 mmol), Togni's reagent II (474 mg, 1.50 mmol) and anhydrous DMF (5.0 mL) were placed into an oven-dried Schlenk tube that is equipped with a stirring bar under Ar. Organozinc reagents (0.5 mmol) was then added dropwise. The reaction was stirred at room temperature until the disappearance of Togni's reagent II (typically 20 min as monitored by  $^{19}\text{F}$  NMR spectroscopy). The product was purified by flash chromatography on silica gel with pentane and isolated as a light yellow liquid in 48% yield (62 mg).  $^1\text{H}$  NMR (400 MHz,  $\text{CDCl}_3$ )  $\delta$  7.77 (d,  $J = 7.8$  Hz, 1 H), 7.65 (t,  $J = 7.6$  Hz, 1 H), 7.56 (d,  $J = 8.0$  Hz, 2 H), 7.51 (d,  $J = 7.7$  Hz, 1 H),  $\delta$  7.46 (d,  $J = 7.7$  Hz, 1H), 7.43 (d,  $J = 7.7$  Hz, 2H), 3.44 (q,  $J = 10.7$  Hz, 2 H);  $^{13}\text{C}$  NMR (101 MHz,  $\text{CDCl}_3$ )  $\delta$  144.7, 138.0, 133.8, 132.9, 130.8, 130.7, 130.5, 130.0, 127.8, 125.7 (q,  $J = 276.9$  Hz), 118.6, 111.2, 39.9 (q,  $J = 29.8$  Hz);  $^{19}\text{F}$  NMR (376 MHz,  $\text{CDCl}_3$ )  $\delta$  -65.70 (t,  $J = 10.8$  Hz, 3 F) ppm. MS (EI)  $m/z$  (%) 261.1(100). HRMS (EI) Calcd for:  $\text{C}_{15}\text{H}_{10}\text{F}_3\text{N}$ : 261.0765; Found: 261.0766. IR (thin film):  $\nu_{\text{max}}$  3065, 2919, 2224, 1479, 1445, 1361, 1260, 1138, 1077, 911, 813, 764, 657  $\text{cm}^{-1}$ .

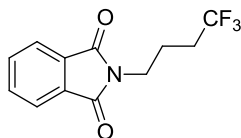

**2-(4,4,4-Trifluorobutyl)isoindoline-1,3-dione (4m).** Freshly prepared CuI (28 mg, 0.15 mmol), Togni's reagent II (474 mg, 1.50 mmol) and anhydrous DMF (5.0 mL) were placed into an oven-dried Schlenk tube that is equipped with a stirring bar under Ar. Organozinc reagents (0.5 mmol) was then added dropwise. The reaction was stirred at room temperature until the disappearance of Togni's reagent II (typically 20 min as monitored by  $^{19}\text{F}$  NMR spectroscopy). The product was purified by flash chromatography on silica gel with pentane and isolated as a white solid in 49% yield (63 mg).  $^1\text{H}$  NMR (400 MHz,  $\text{CDCl}_3$ )  $\delta$  7.83 (dd,  $J = 5.4, 3.1$  Hz, 2 H), 7.71 (dd,  $J = 5.4, 3.0$  Hz, 2 H), 3.73 (t,  $J = 7.0$  Hz, 2 H), 2.21 – 2.07 (m, 2 H), 2.00 – 1.86 (m, 2 H);  $^{13}\text{C}$  NMR (101 MHz,  $\text{CDCl}_3$ )  $\delta$  168.2, 134.1, 131.9, 126.7 (q,  $J = 276.2$  Hz), 123.4, 36.7, 31.5 (q,  $J = 29.4$  Hz), 21.5 (q,  $J = 2.9$  Hz);  $^{19}\text{F}$  NMR (376 MHz,  $\text{CDCl}_3$ )  $\delta$  -66.43 (t,  $J = 10.6$  Hz, 3F).

**Reference:** Mizuta, S.; Verhoog, S.; Engle, K. M.; Khotavivattana, T.; O'Duill, M.; Wheelhouse, K.; Rassias, G.; Médebielle, M.; Gouverneur, V. *J. Am. Chem. Soc.* **2013**, *135*, 2505.

### General Procedure for Preparation of Aryl Iodides

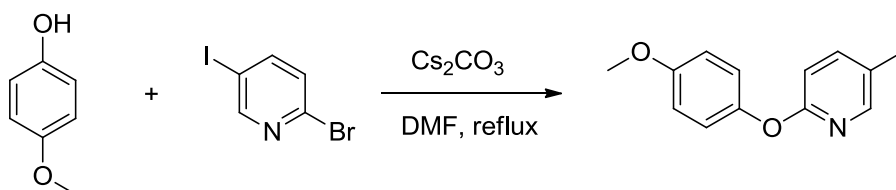

The procedure described for 5-iodo-2-(4-methoxyphenoxy) pyridine was applied with 4-methoxyphenol (0.44 g, 3.5 mmol) 2-bromo-5-iodopyridine (1.0 g, 3.5 mmol),

Cs<sub>2</sub>CO<sub>3</sub> (2.6 g, 8.0 mmol), and DMF (20 mL) to give title compound as a white solid.

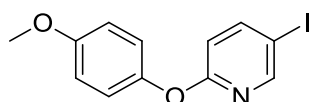

**5-Iodo-2-(4-methoxyphenoxy)pyridine (1b).** White solid. <sup>1</sup>H NMR (300 MHz, CDCl<sub>3</sub>) δ 7.48 (t, *J* = 7.8 Hz, 1 H), 7.16 (d, *J* = 7.6 Hz, 1 H), 7.17 (d, *J* = 9.0 Hz, 2 H), 6.92 (d, *J* = 9.1 Hz, 2 H), 6.71 (d, *J* = 8.1 Hz, 1 H), 3.82 (s, 3 H); <sup>13</sup>C NMR (101 MHz, CDCl<sub>3</sub>) δ 163.9, 157.0, 153.7, 147.3, 147.1, 122.5 (d, *J* = 5.0 Hz), 115.0, 113.5, 83.9, 55.8 ppm. MS (EI) *m/z* (%) 327.0 (100).

**Reference:** Krasovskiy, A.; Knochel, P. *Angew. Chem. Int. Ed.* **2006**, *45*, 6040.

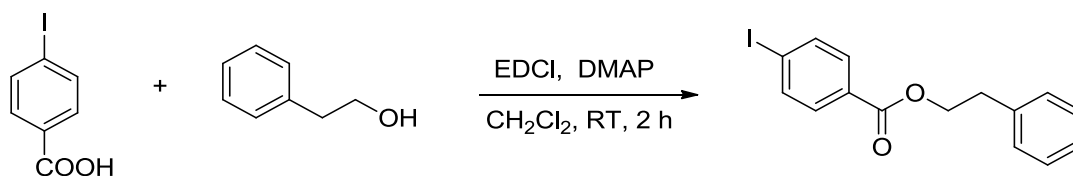

The procedure described for phenethyl 4-iodobenzoate was applied with 4-iodobenzoic acid (2.0 g, 8.1 mmol), 2-phenylethanol (1.1 g, 8.8 mmol), DMAP (0.11 g, 0.88 mmol), and EDCI (1.5 g, 8.1 mmol) to give title compound as a white solid.

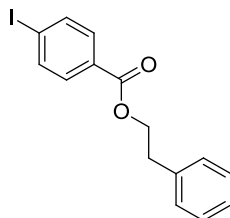

**Phenethyl 4-iodobenzoate (1c).** White solid. <sup>1</sup>H NMR (300 MHz, CDCl<sub>3</sub>) δ 7.79 (d, *J* = 8.2 Hz, 2 H), 7.71 (d, *J* = 8.5 Hz, 2 H), 7.37 – 7.26 (m, 5 H), 4.52 (t, *J* = 7.0 Hz, 2 H), 3.07 (t, *J* = 7.0 Hz, 2 H); <sup>13</sup>C NMR (101 MHz, CDCl<sub>3</sub>) δ 166.0, 137.7, 131.0, 129.7, 129.0, 128.6, 126.7, 100.8, 65.7, 35.2 ppm. MS (EI) *m/z* (%) 352.0, 104 (100).

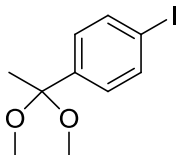

**2-(4-Iodophenyl)-2-methyl-1,3-dioxolane (1d).** White solid. <sup>1</sup>H NMR (400 MHz, CDCl<sub>3</sub>) δ 7.66 (d, *J* = 8.3 Hz, 2 H), 7.22 (d, *J* = 8.3 Hz, 2 H), 4.02 (t, *J* = 6.9 Hz, 2 H), 3.74 (t, *J* = 6.9 Hz, 2 H), 1.61 (s, 3 H); <sup>13</sup>C NMR (101 MHz, CDCl<sub>3</sub>) δ 143.3, 137.5,

127.6, 108.7, 93.8, 64.7, 27.7 ppm. MS (EI) m/z (%) 290.0, 275.0 (100).

**Reference:** Jefferson, N,-W.; Wayland, M,-A. US 2011/0190489.A1.

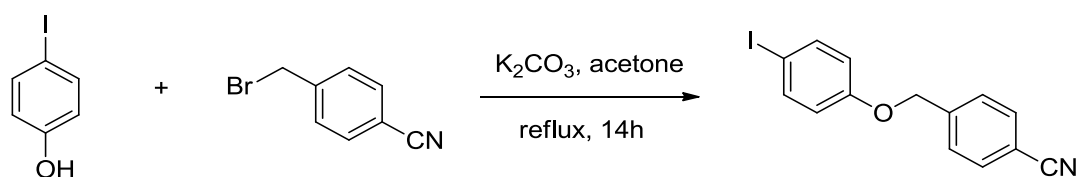

To a flask, 4-iodophenol (4.22 g, 19.2 mmol),  $K_2CO_3$  (13.32 g, 96.4 mmol), and 4-(bromomethyl)benzonitrile (3.20 g, 16.0 mmol) were dissolved in 120 mL of acetone and the mixture was stirred under reflux for 14 h. After filtered, the mixture was concentrated *in vacuo*. The residue was dissolved in 30 mL of  $Et_2O$ , washed with  $H_2O$  (10 mL x 3), and brine. The organic layer was dried over  $Na_2SO_4$ , filtered and concentrated *in vacuo*. The residue was purified by flash column chromatography to yield the title compound as a white solid.

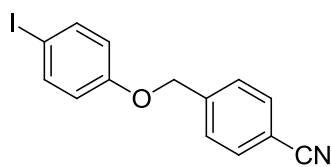

**4-((4-Iodophenoxy)methyl)benzonitrile (1e).** White solid.  $^1H$  NMR (400 MHz,  $CDCl_3$ )  $\delta$  7.68 (d,  $J = 8.2$  Hz, 2 H), 7.57 (d,  $J = 8.9$  Hz, 2 H), 7.52 (d,  $J = 8.1$  Hz, 2 H), 6.72 (d,  $J = 8.8$  Hz, 2 H), 5.09 (s, 2 H);  $^{13}C$  NMR (101 MHz,  $CDCl_3$ )  $\delta$  158.2, 142.2, 138.6, 132.6, 127.7, 118.2, 117.4, 112.0, 83.9, 69.1 ppm. MS (EI) m/z (%) 335.0, 116.1 (100).

## Mechanistic Experiments

### a) Radical-clock experiment.

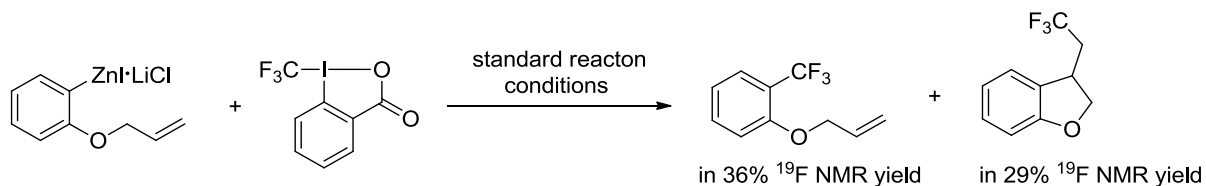

Freshly prepared CuI (28 mg, 0.15 mmol), Togni's reagent II (474 mg, 1.50 mmol) and anhydrous DMF (5.0 mL) were placed into an oven-dried Schlenk tube that is equipped with a stirring bar under Ar. Organozinc reagents (0.5 mmol) was then added dropwise. The reaction was stirred at room temperature until the disappearance of Togni's reagent II. The product was purified by flash chromatography on silica gel with pentane.

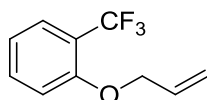

**1-(Allyloxy)-2-(trifluoromethyl)benzene.** <sup>1</sup>H NMR (400 MHz, CDCl<sub>3</sub>) δ 7.56 (d, *J* = 7.7 Hz, 1 H), 7.45 (t, *J* = 7.9 Hz, 1 H), 7.02 – 6.94 (m, 2 H), 6.08 – 5.97 (m, 1 H), 5.46 (m, 1 H), 5.31 – 5.26 (m, 1 H), 4.62 (dt, *J* = 4.7, 1.6 Hz, 2 H). <sup>19</sup>F NMR (376 MHz, CDCl<sub>3</sub>) δ -62.43 (s, 3 F). MS (EI) *m/z* (%) 201.9 (100). HRMS (EI) Calcd for: C<sub>10</sub>H<sub>9</sub>F<sub>3</sub>O: 202.0605; Found: 202.0602.

#### <sup>19</sup>F NMR Spectrum of 1-(allyloxy)-2-(trifluoromethyl)benzene

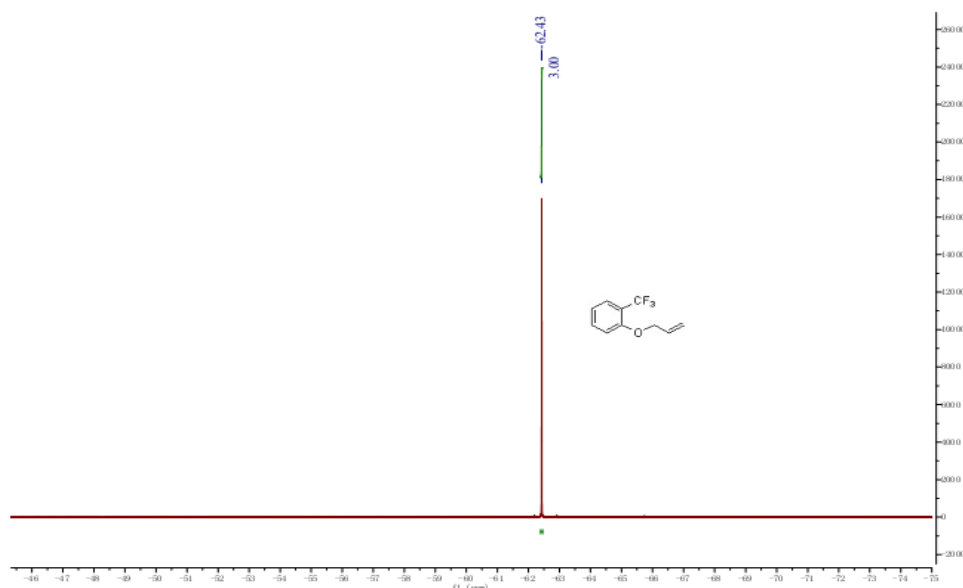

**<sup>1</sup>H NMR Spectrum of 1-(allyloxy)-2-(trifluoromethyl)benzene**

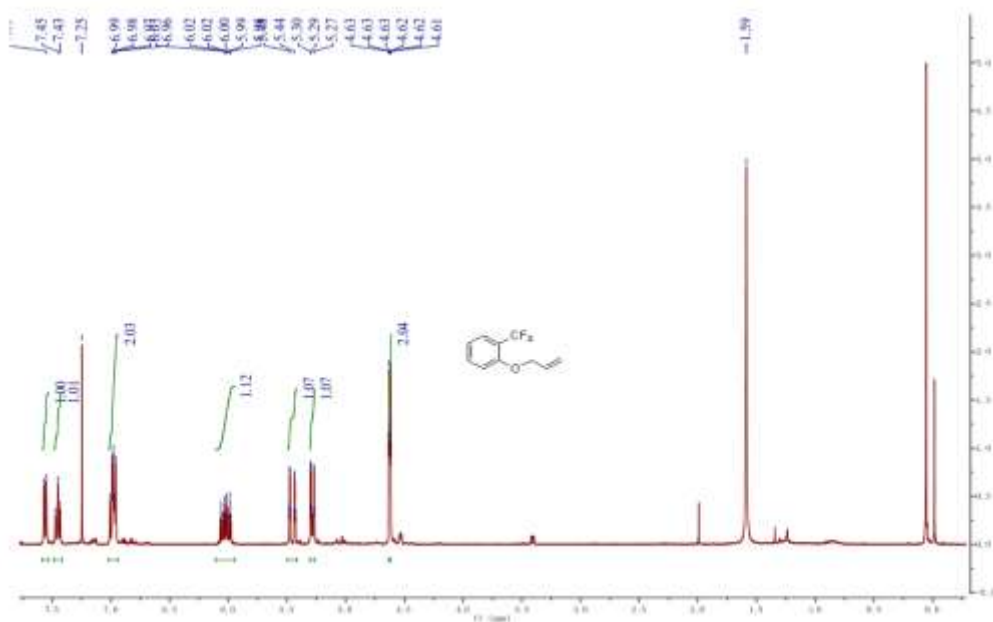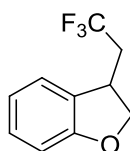

**3-(2,2,2-Trifluoroethyl)-2,3-dihydrobenzofuran.** <sup>1</sup>H NMR (400 MHz, CDCl<sub>3</sub>) δ 7.19 (m, *J* = 14.4, 2 H), 6.90 – 6.85 (m, 1 H), 6.79 (m, 1 H), 4.63 (m, 1 H), 4.33 (dd, *J* = 9.4, 5.5 Hz, 1 H), 3.83 (tt, *J* = 9.4, 4.9 Hz, 1 H), 3.45 (dd, *J* = 9.9, 4.4 Hz, 1 H), 3.20 (t, *J* = 9.8 Hz, 1 H). <sup>19</sup>F NMR (376 MHz, CDCl<sub>3</sub>) δ -65.03 (t, *J* = 10.9 Hz, 3 F). MS (EI) *m/z*(%) 201.9 (100). HRMS (EI) Calcd for: C<sub>10</sub>H<sub>9</sub>F<sub>3</sub>O: 202.0605; Found: 202.0606.

**<sup>19</sup>F NMR Spectrum of 3-(2,2,2-trifluoroethyl)-2,3-dihydrobenzofuran.**

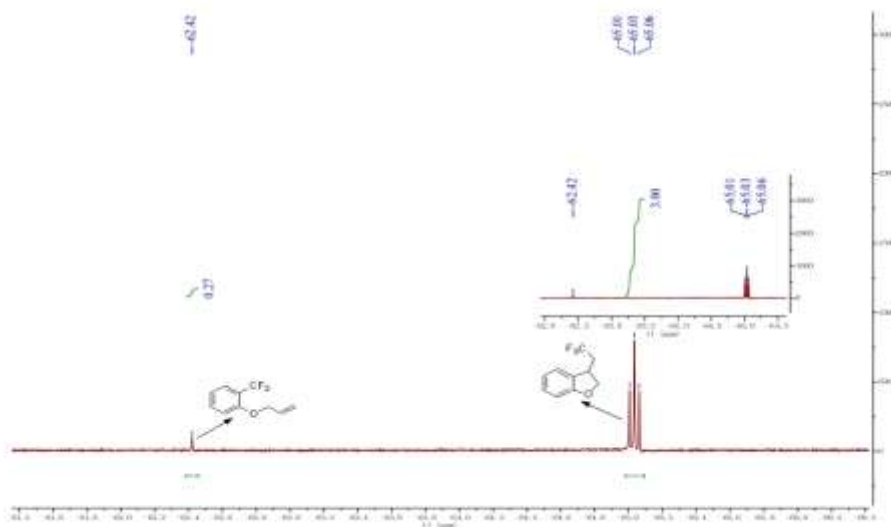

**<sup>1</sup>H NMR Spectrum of 3-(2,2,2-trifluoroethyl)-2,3-dihydrobenzofuran.**

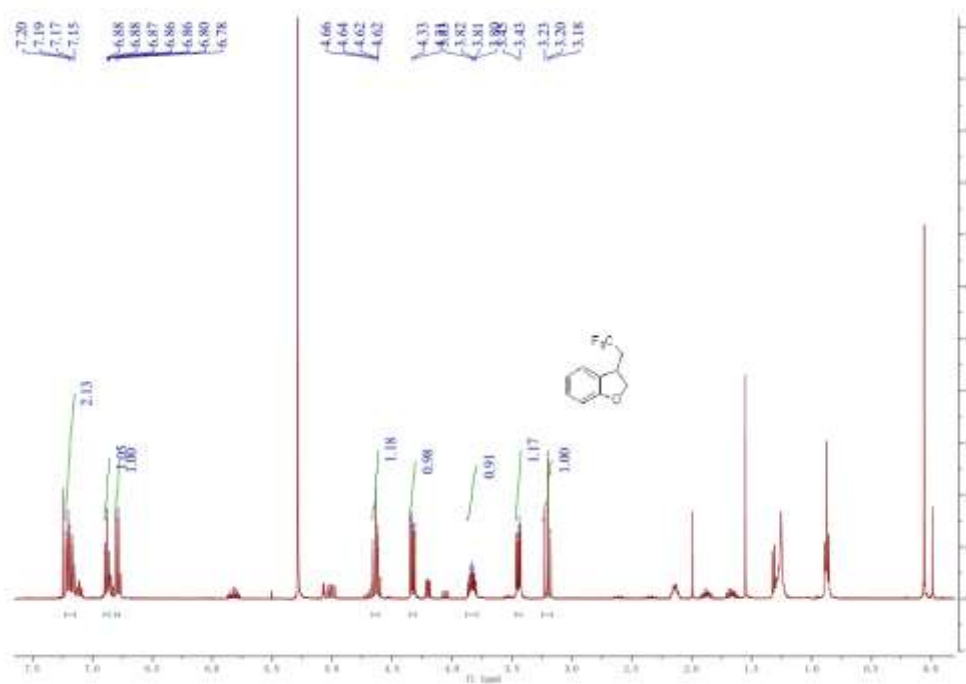

**b) Radical Trap experiment.**

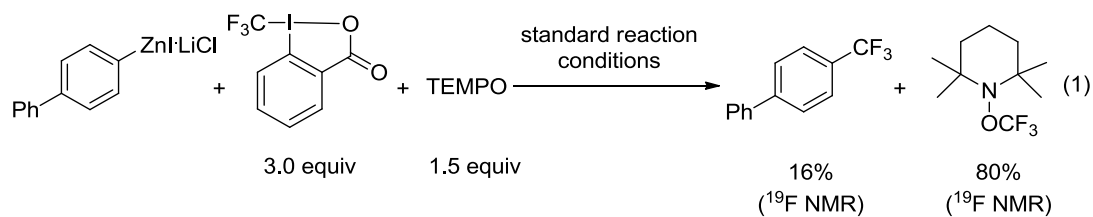

Freshly prepared CuI (6 mg, 0.03 mmol), Togni's reagent II (95 mg, 0.30 mmol) and anhydrous DMF (1.0 mL) were placed into an oven-dried Schlenk tube that is



equipped with a stirring bar under Ar. Organozinc reagents (0.1 mmol) and 1.5 equivalents of TEMPO were then added. The reaction was stirred at room temperature until the disappearance of Togni's reagent II. The reaction was monitored by  $^{19}\text{F}$  NMR spectroscopy.

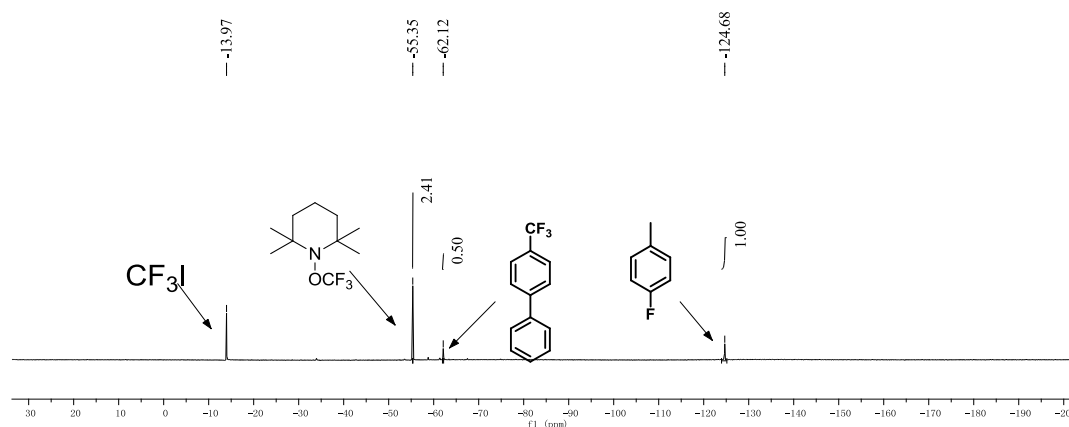

**Figure S1.** The reaction was monitored by  $^{19}\text{F}$  NMR spectroscopy using *p*-Fluorotoluene as an internal standard (it showed the formation of  $\text{CF}_3\text{I}$  (resonated at  $\delta = -13.97$  ppm in  $^{19}\text{F}$  NMR), trifluoromethylated TEMPO (resonated at  $\delta = -55.35$  ppm in  $^{19}\text{F}$  NMR), trifluoromethylated biphenyl (resonated at  $\delta = -62.12$  ppm in  $^{19}\text{F}$  NMR).

### c) Stoichiometric reaction monitored by $^{19}\text{F}$ NMR spectroscopy.

Freshly prepared  $\text{CuI}$  (19 mg, 0.1 mmol), Togni's reagent II (95 mg, 0.3 mmol) and anhydrous DMF (1.0 mL) were placed into an oven-dried Schlenk tube that is equipped with a stirring bar under Ar. A clear blue solution was formed within 1.0 min at room temperature upon. The reaction was monitored by  $^{19}\text{F}$  NMR spectroscopy. Addition of 10 mL of diethyl ether precipitated a blue solid which was characterized to be bimetallic copper(II) species **8**, as determined by X-ray diffraction of its single crystals. After the diethyl ether was removed under vacuum, the DMF solution of the reaction mixture was treated with 1.0 equivalent of 4-biphenyl zinc reagent. After 20 min, the peak at -30.5 ppm disappeared and a new peak at -62.4 ppm which corresponds to the trifluoromethylated biphenyl formed in 47% yield, as determined by  $^{19}\text{F}$  NMR spectroscopy (Fig. S3).

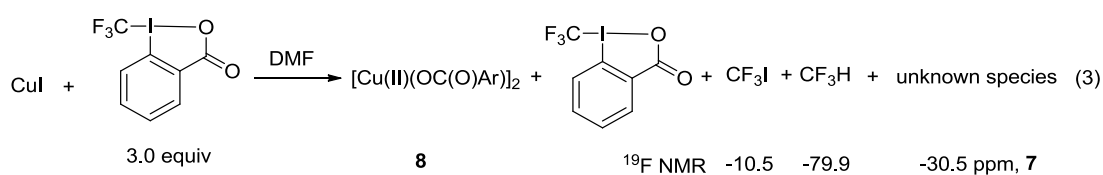

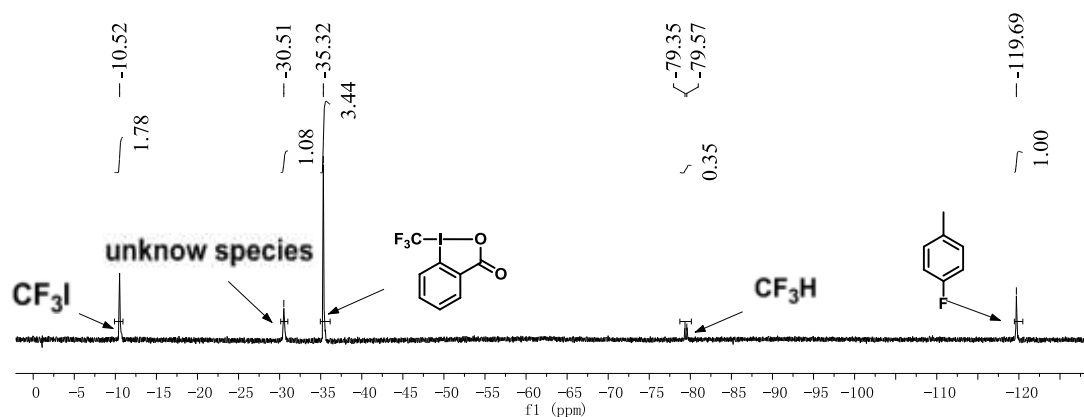

**Figure S2.** The reaction was monitored by  $^{19}\text{F}$  NMR spectroscopy using *p*-Fluorotoluene as an internal standard (it showed the formation of  $\text{CF}_3\text{I}$  (resonated at  $\delta = -10.5$  ppm in  $^{19}\text{F}$  NMR),  $\text{CF}_3\text{H}$  (resonated at  $\delta = -79.5$  ppm in  $^{19}\text{F}$  NMR), unreacted reagent **2** and an unknown species **7** (resonated at  $\delta = -30.5$  ppm in  $^{19}\text{F}$  NMR).

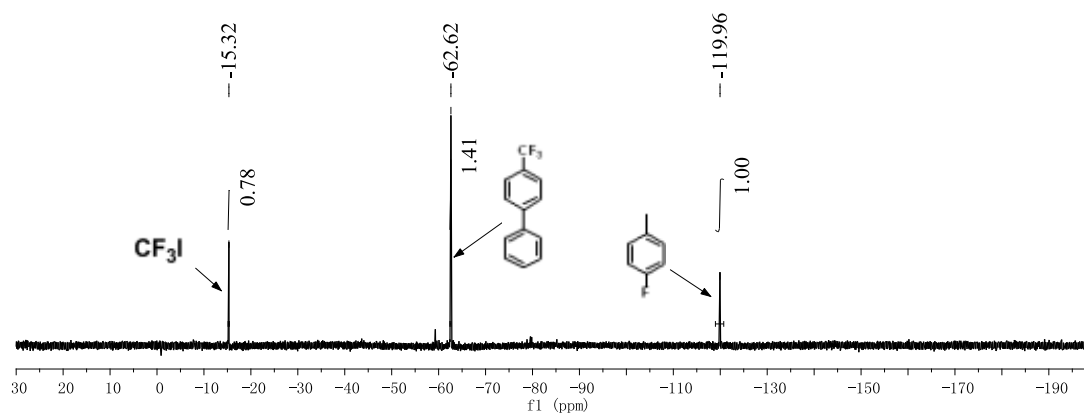

**Figure S3.**  $^{19}\text{F}$  NMR spectroscopy for reaction of the DMF solution of above solution after removing the copper(II) salts with aryl zinc reagent **2** after 20 min at room temperature, using *p*-Fluorotoluene as an internal standard.

**d) Evidence supports that the chemical shift of  $^{19}\text{F}$  NMR spectroscopy of  $\text{CF}_3\text{I}$  in a mixed THF/DMF solvent shifted to -15.32 ppm.**

To gain evidence that the peak at -15.32 ppm corresponds to the signal of  $\text{CF}_3\text{I}$ , we added a small amount of authentic  $\text{CF}_3\text{I}$  to the reaction mixture and the mixture was monitored by  $^{19}\text{F}$  NMR spectroscopy. It was found that the peak at -15.32 ppm increased sharply and no new peak was discovered.

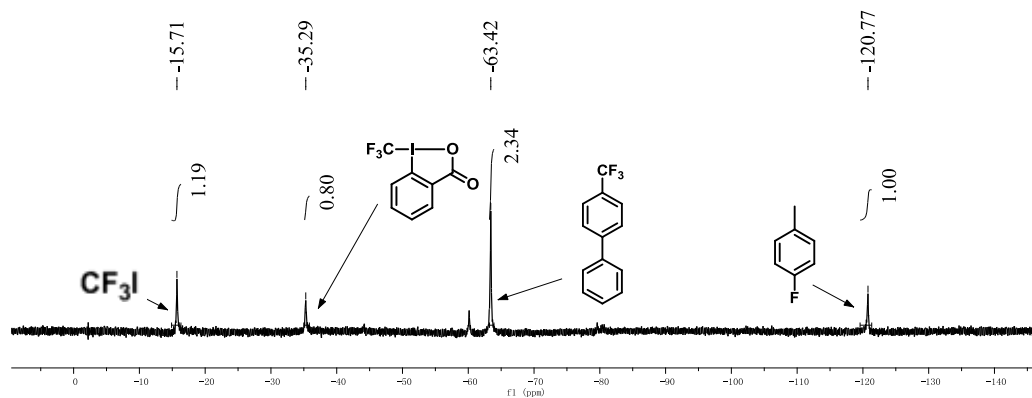

**Figure S4.**  $^{19}\text{F}$  NMR analysis of the crude product using *p*-Fluorotoluene as an internal standard.

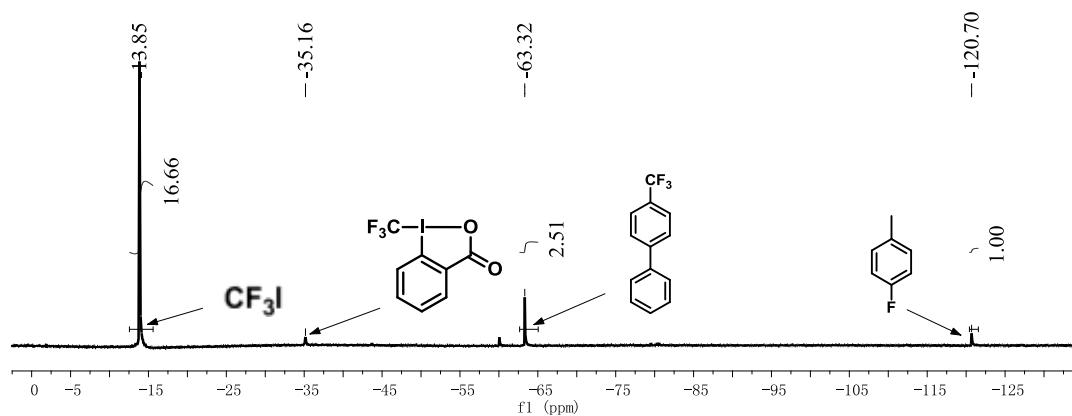

**Figure S5.**  $^{19}\text{F}$  NMR spectroscopy after the addition of a small amount of  $\text{CF}_3\text{I}$ .

### <sup>1</sup>H NMR Spectrum of 4-(trifluoromethyl)-1,1'-biphenyl (4a)

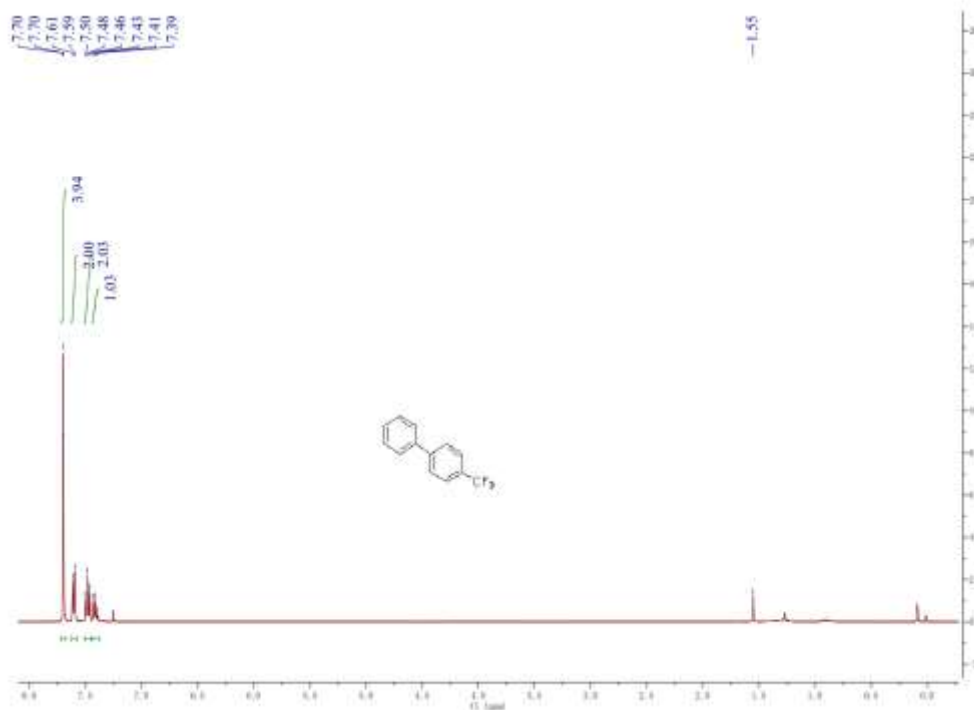

### <sup>19</sup>F NMR Spectrum of 4-(trifluoromethyl)-1,1'-biphenyl (4a)

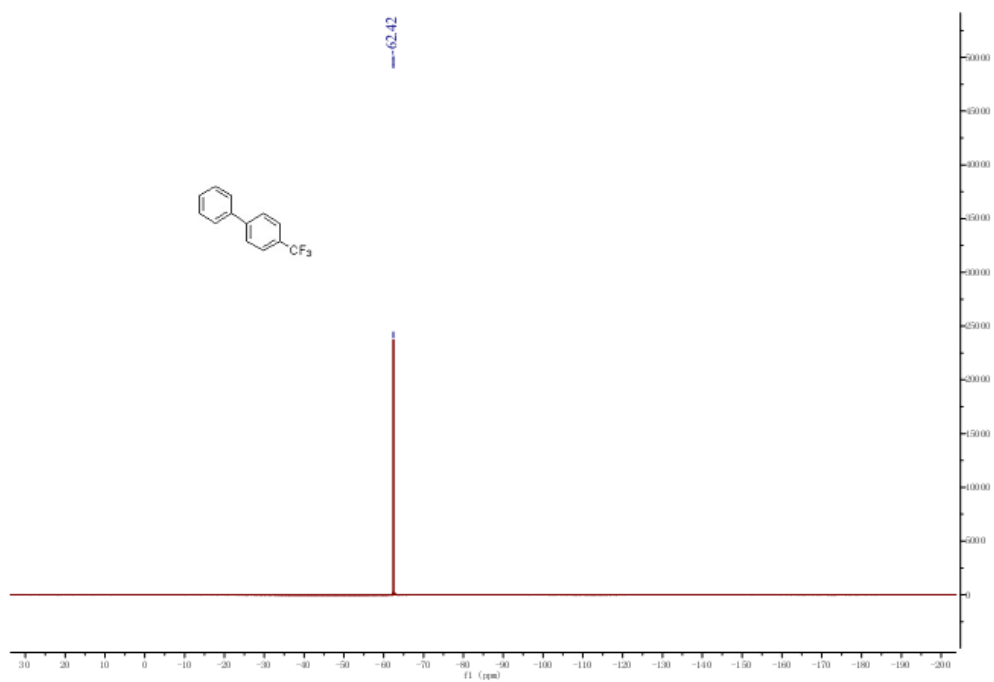

### <sup>13</sup>C NMR Spectrum of 4-(trifluoromethyl)-1,1'-biphenyl (4a)

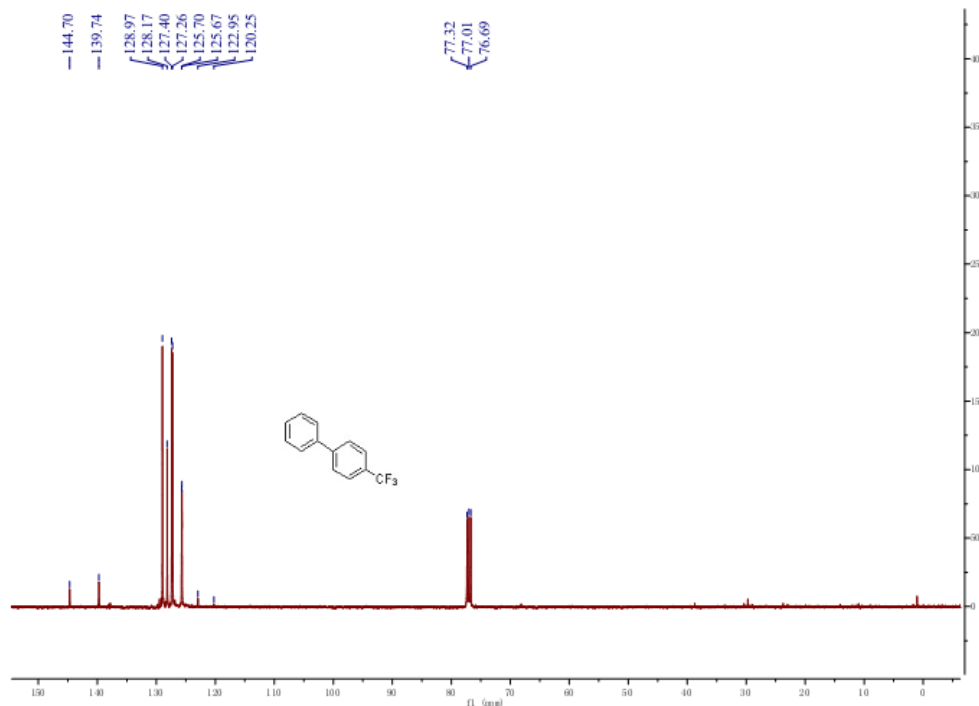

### <sup>1</sup>H NMR Spectrum of 1-(benzyloxy)-4-(trifluoromethyl)benzene (4b)

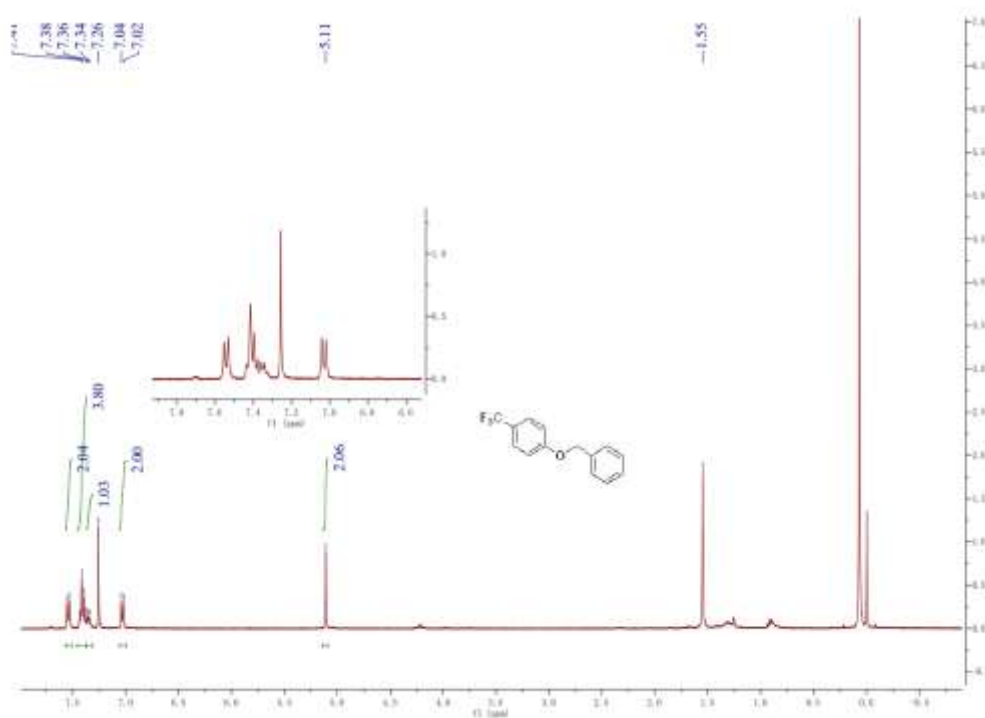

### <sup>19</sup>F NMR Spectrum of 1-(benzyloxy)-4-(trifluoromethyl)benzene (4b)

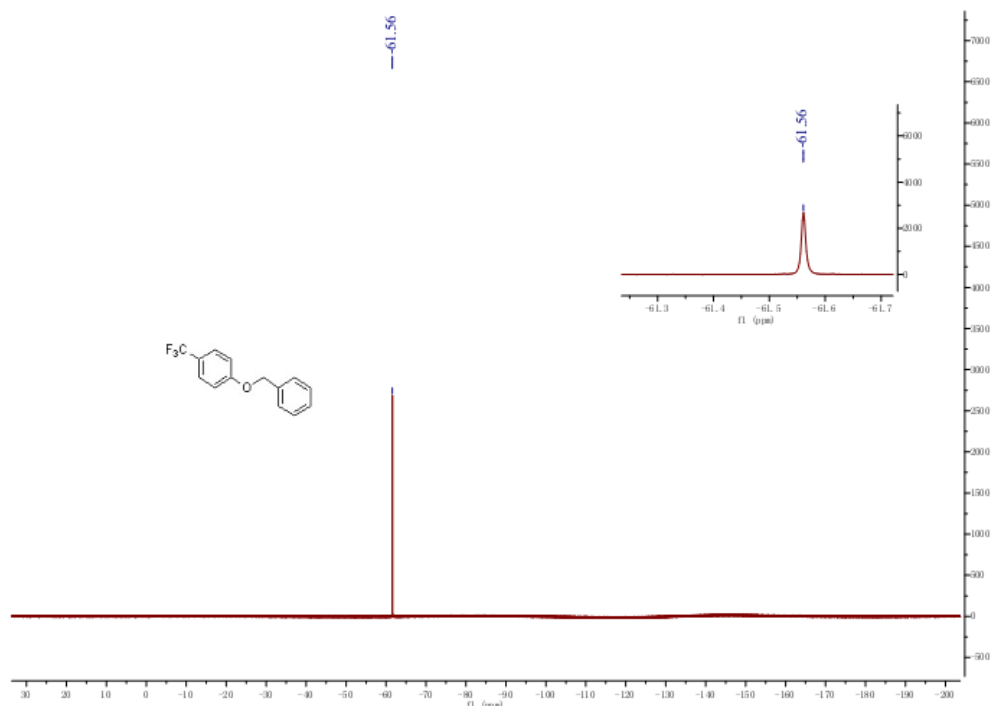

### <sup>13</sup>C NMR Spectrum of 1-(benzyloxy)-4-(trifluoromethyl)benzene (4b)

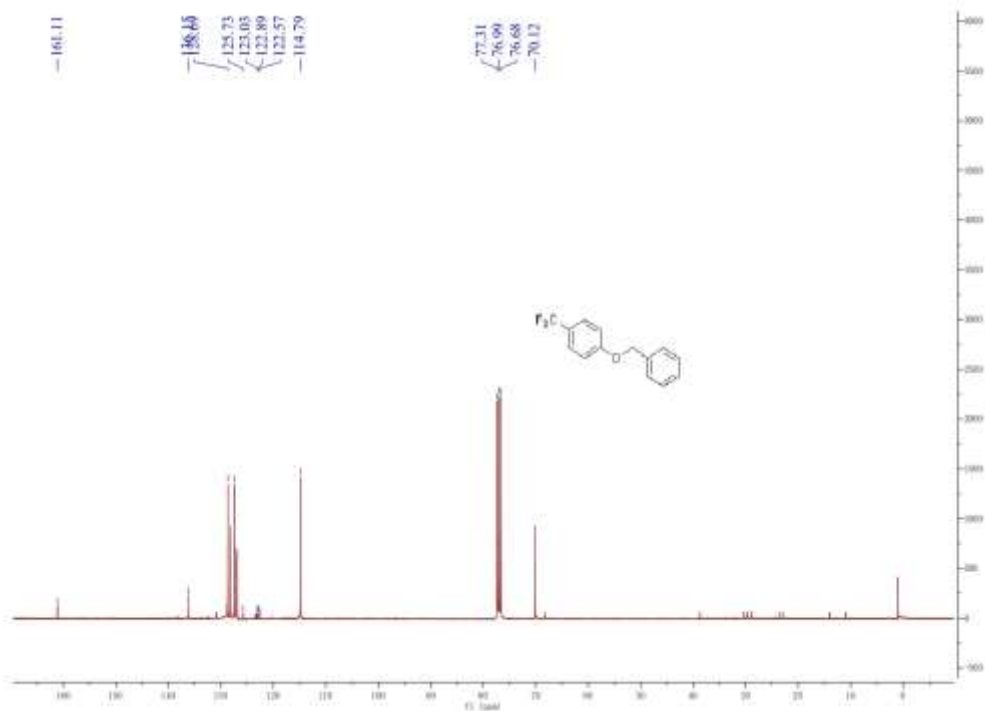

**<sup>1</sup>H NMR Spectrum of 4-((4-(trifluoromethyl)phenoxy)methyl)benzonitrile(4c)**

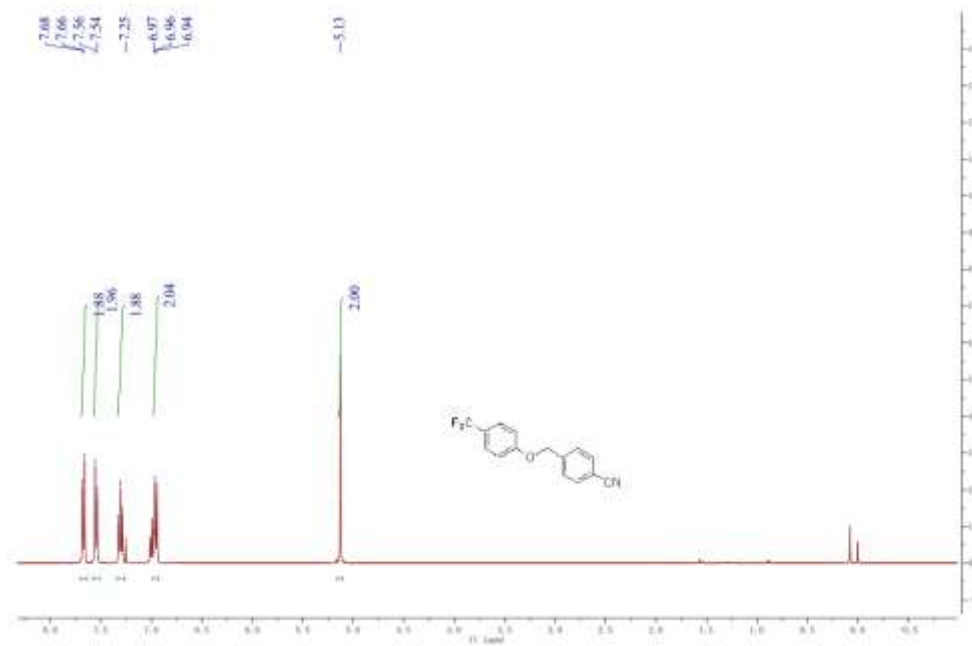

**<sup>19</sup>F NMR Spectrum of 4-((4-(trifluoromethyl)phenoxy)methyl)benzonitrile(4c)**

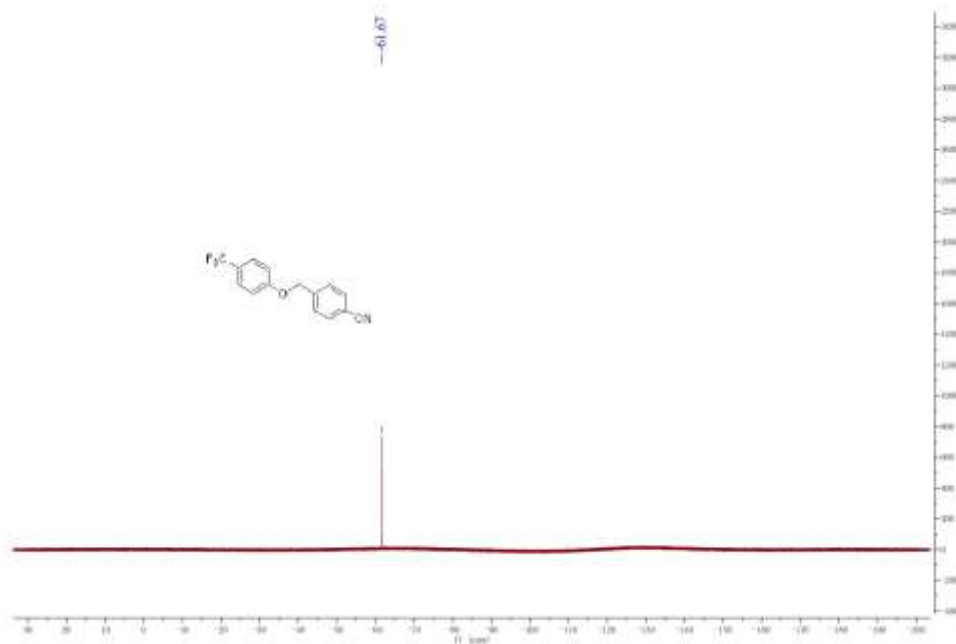

### $^{13}\text{C}$ NMR Spectrum of 4-((4-(trifluoromethyl)phenoxy)methyl)benzotrile(4c)

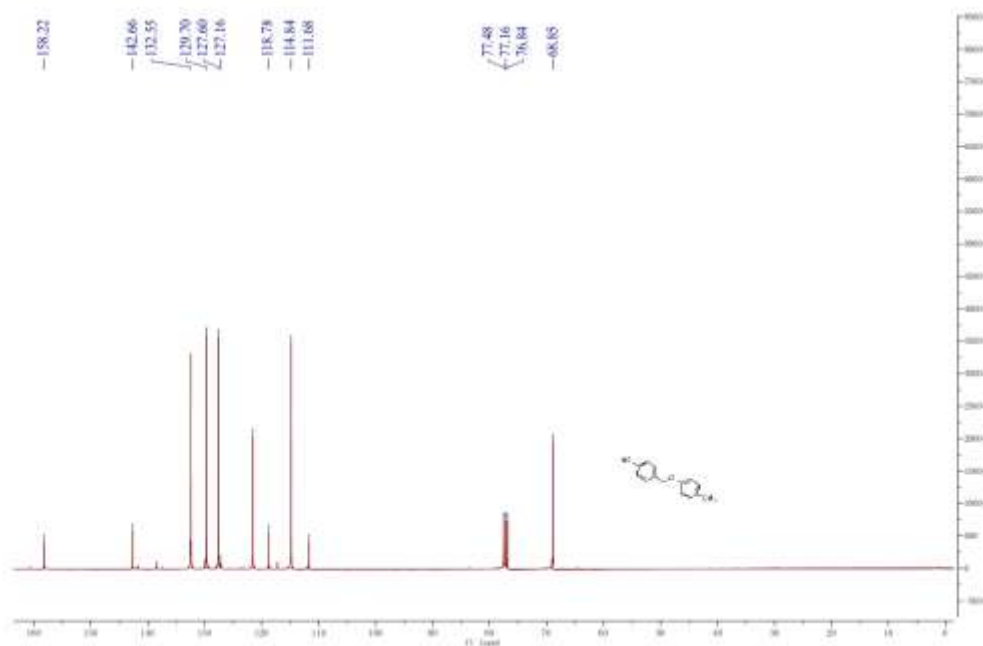

### $^1\text{H}$ NMR Spectrum of phenethyl 4-(trifluoromethyl)benzoate (4d)

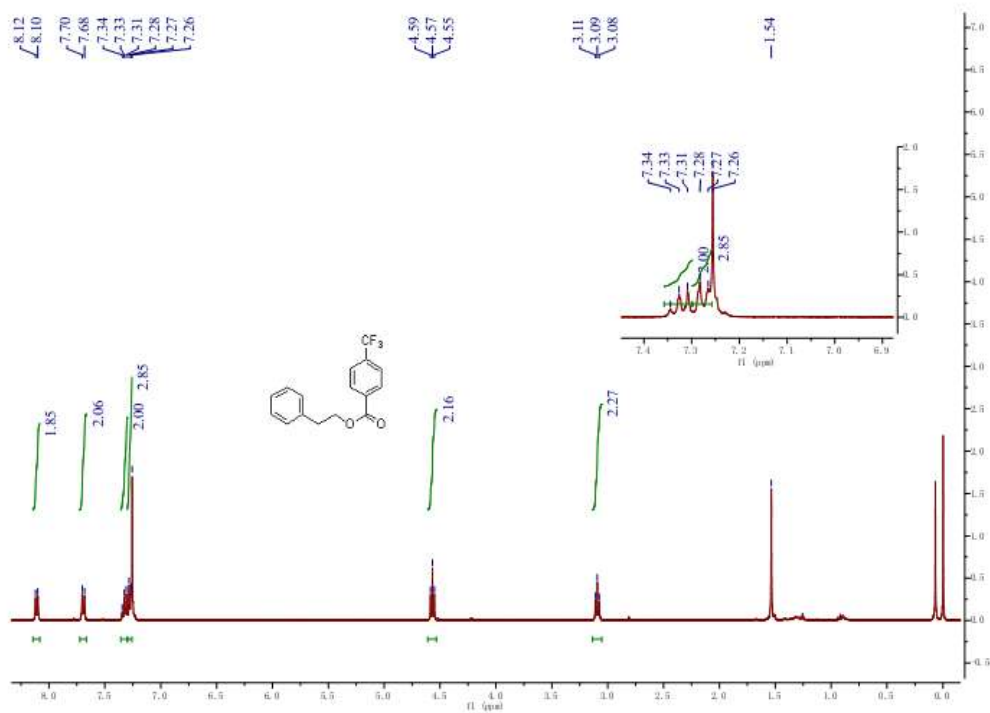



### <sup>19</sup>F NMR Spectrum of phenethyl 4-(trifluoromethyl)benzoate (4d)

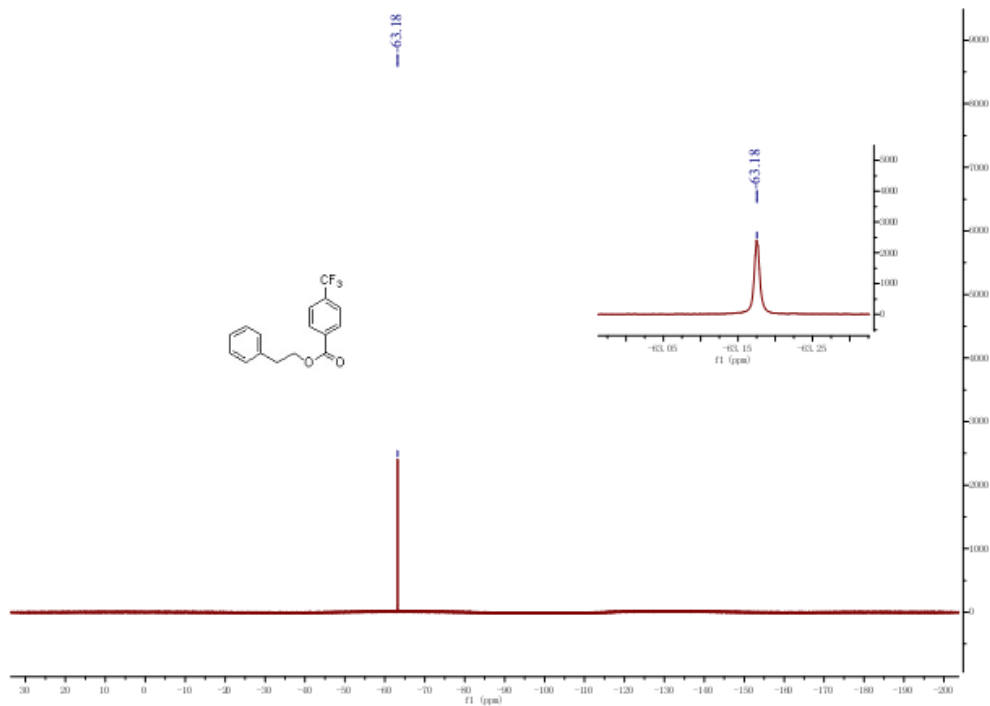

### <sup>13</sup>C NMR Spectrum of phenethyl 4-(trifluoromethyl)benzoate (4d)

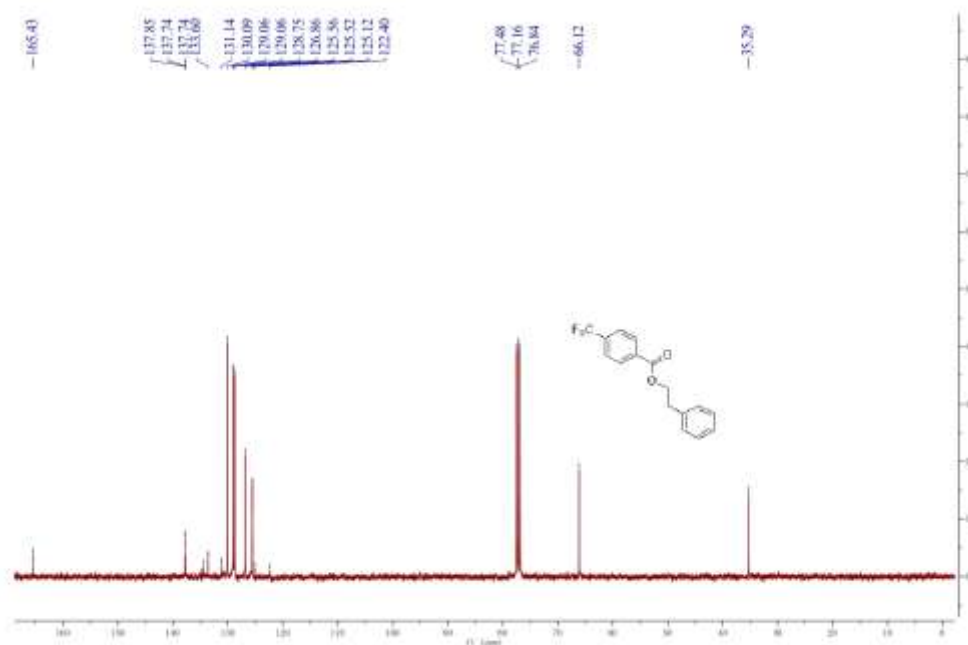

### <sup>1</sup>H NMR Spectrum of piperidin-1-yl(4-(trifluoromethyl)phenyl)methanone (4e)

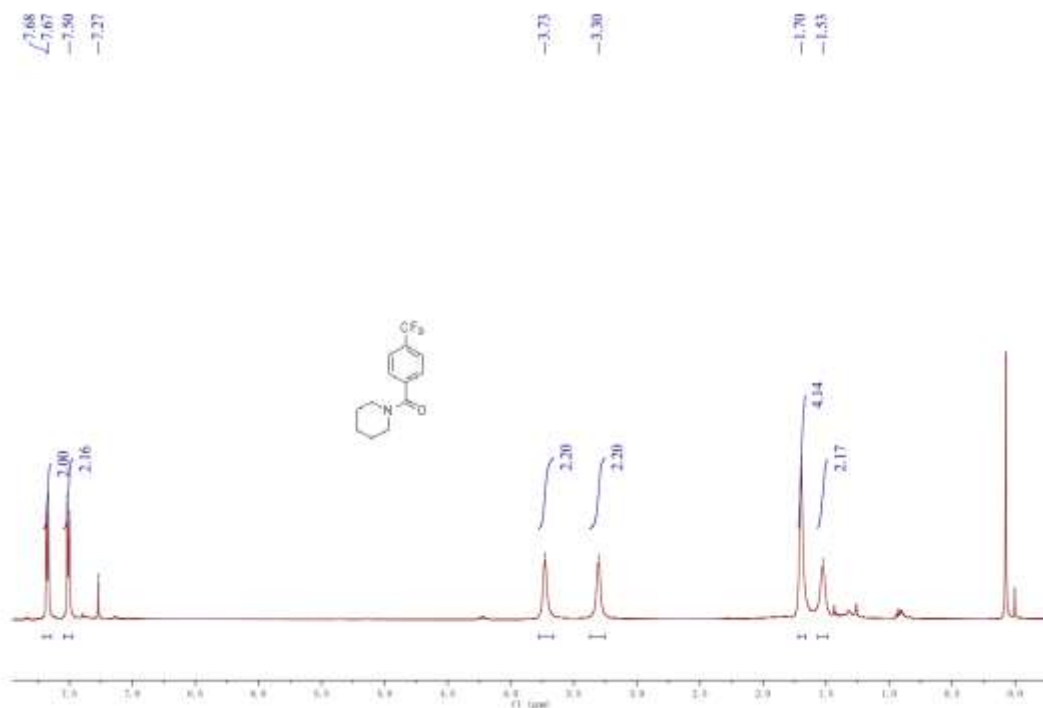

### <sup>13</sup>C NMR Spectrum of piperidin-1-yl(4-(trifluoromethyl)phenyl)methanone (4e)

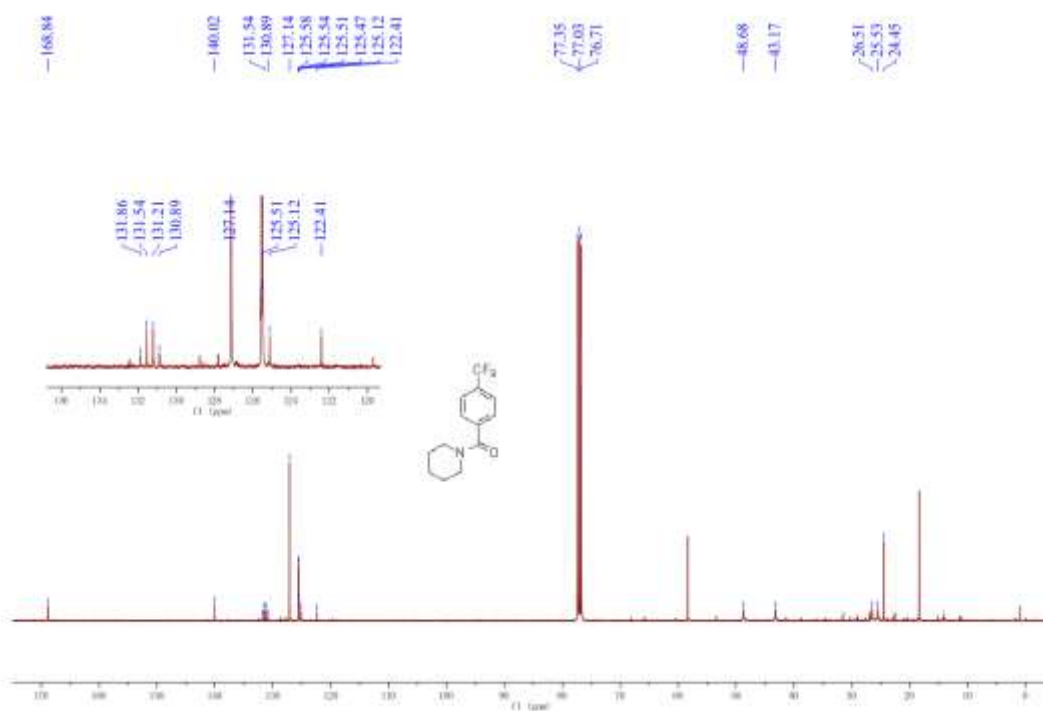

**<sup>19</sup>F NMR Spectrum of piperidin-1-yl(4-(trifluoromethyl)phenyl)methanone (4e)**

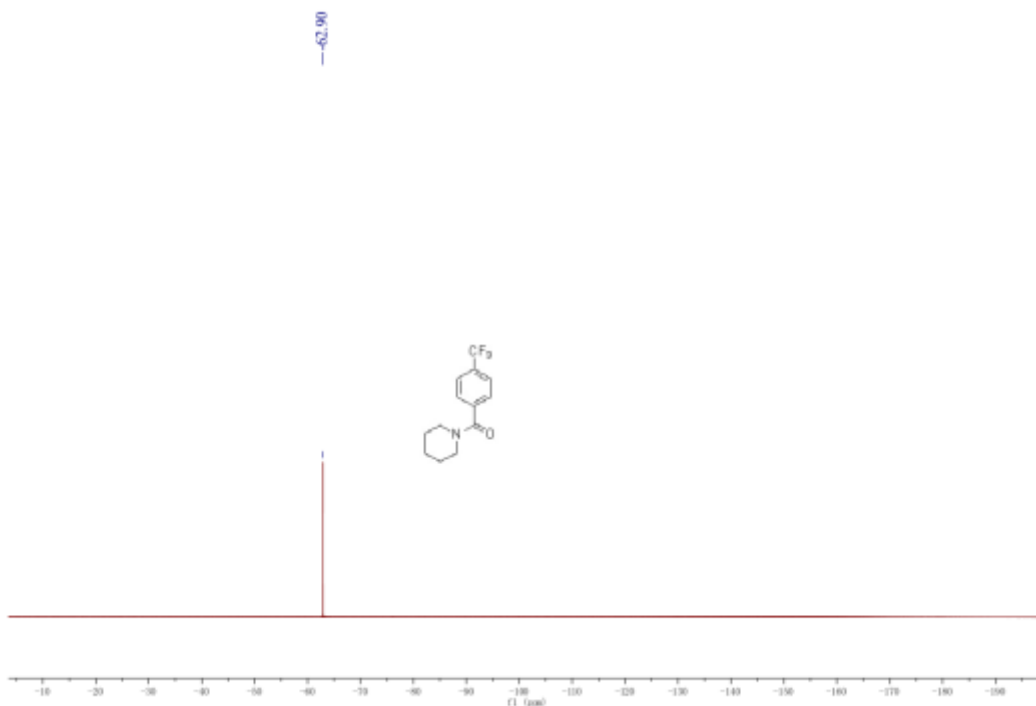

**<sup>1</sup>H NMR Spectrum of 2-methyl-2-(4-(trifluoromethyl)phenyl)-1,3-dioxolane(4f)**

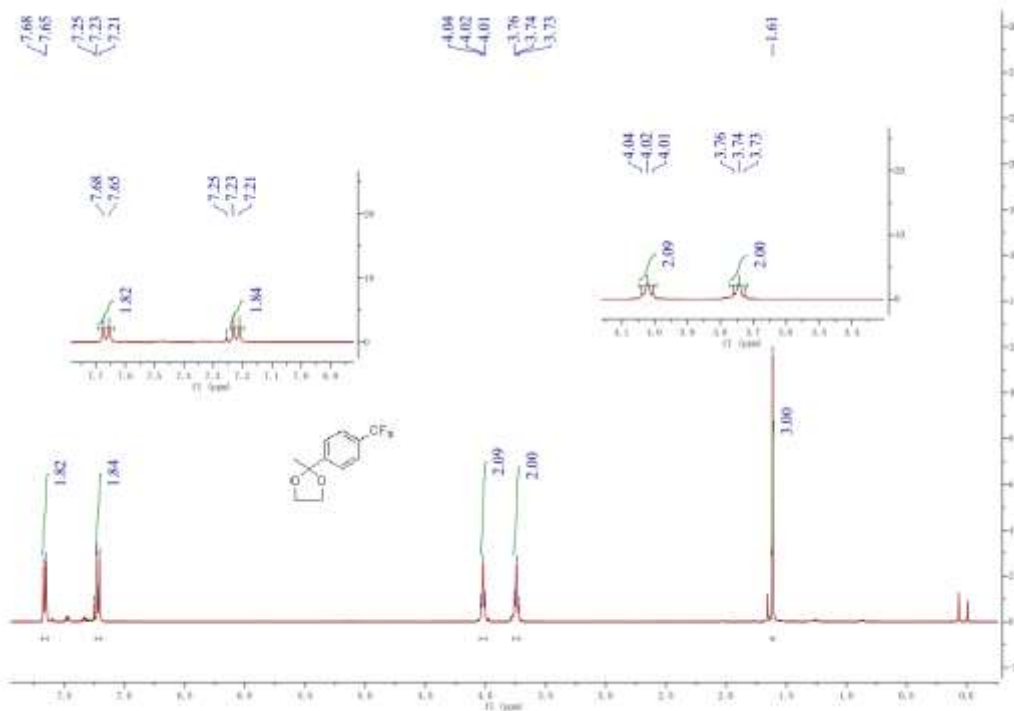

**<sup>19</sup>F NMR Spectrum of 2-methyl-2-(4-(trifluoromethyl)phenyl)-1,3-dioxolane(4f)**

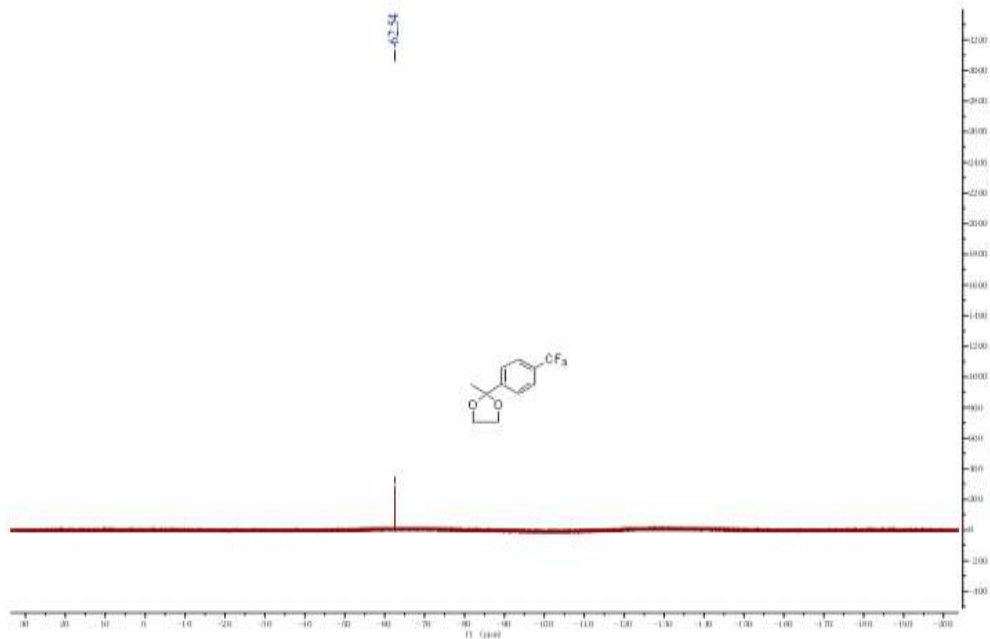

**<sup>13</sup>C NMR Spectrum of 2-methyl-2-(4-(trifluoromethyl)phenyl)-1,3-dioxolane(4f)**

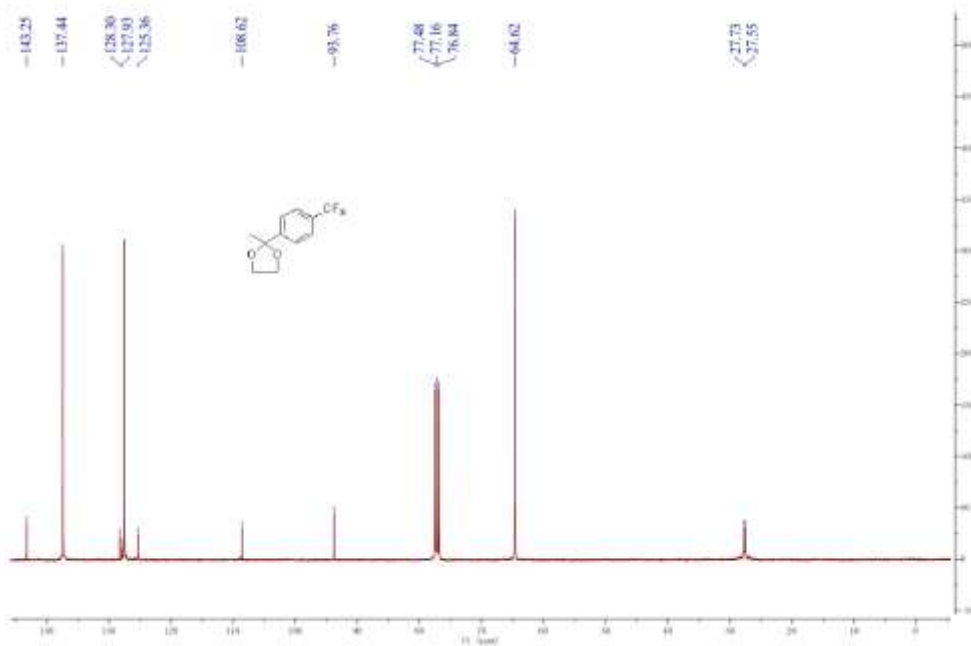

**<sup>1</sup>H NMR Spectrum of phenethyl2-(4-methoxyphenoxy)-5-(trifluoromethyl)pyridine(4g)**

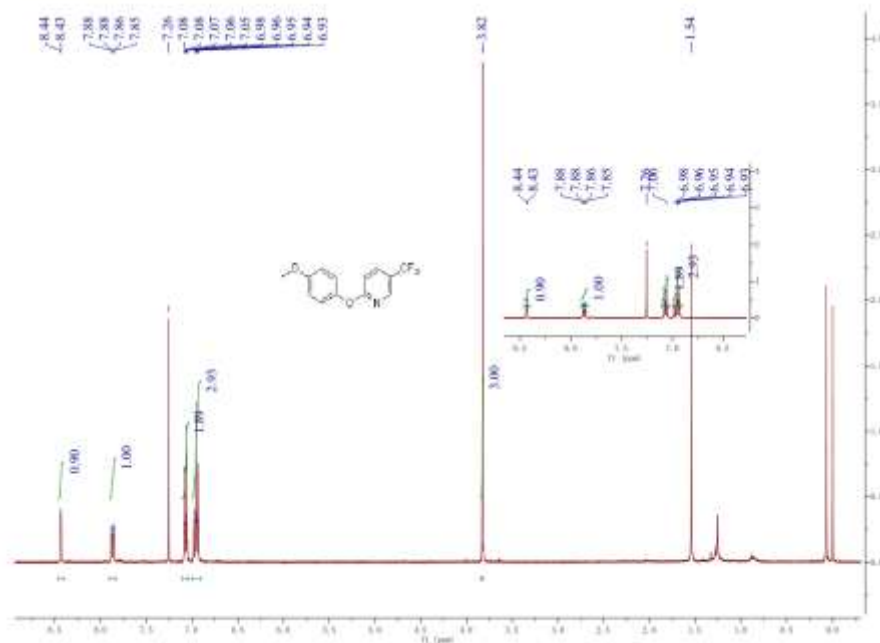

**<sup>19</sup>F NMR Spectrum of phenethyl2-(4-methoxyphenoxy)-5-(trifluoromethyl)pyridine (4g)**

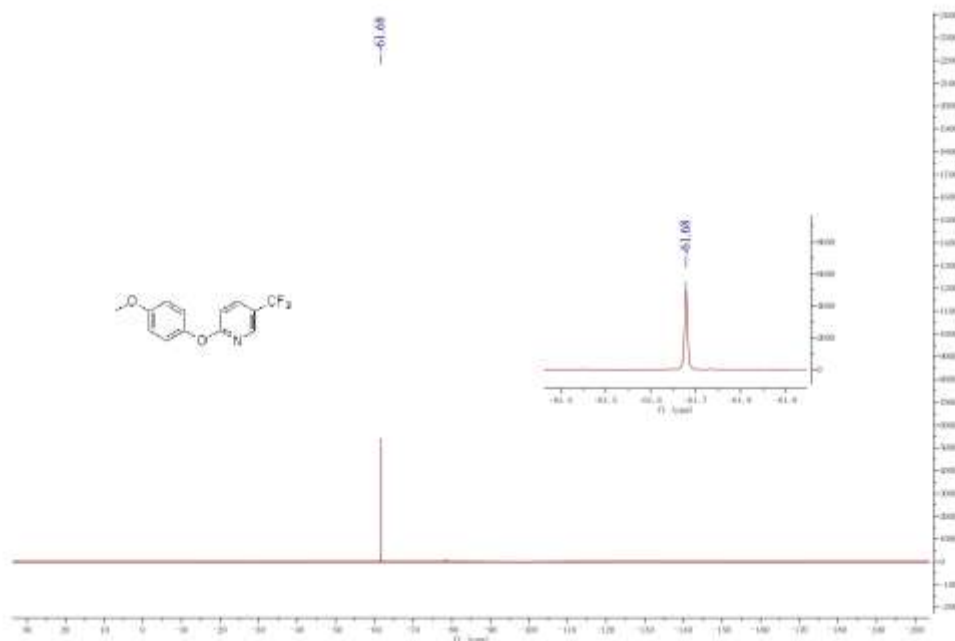

### <sup>13</sup>C NMR Spectrum of phenethyl2-(4-methoxyphenoxy)-5-(trifluoromethyl)pyridine(4g)

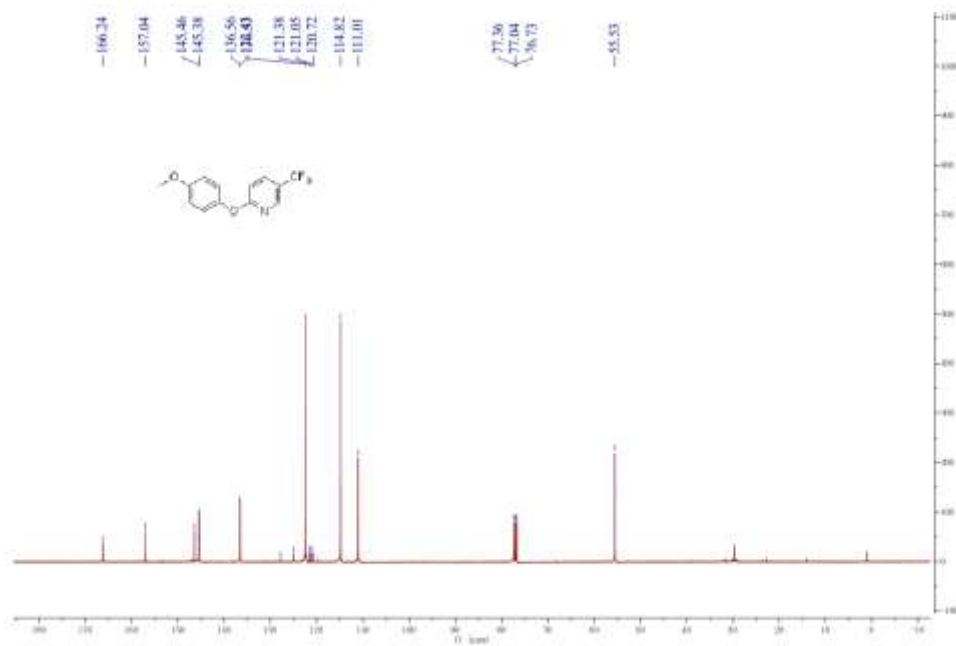

### <sup>1</sup>H NMR Spectrum of 3-(trifluoromethyl)quinoline (4h)

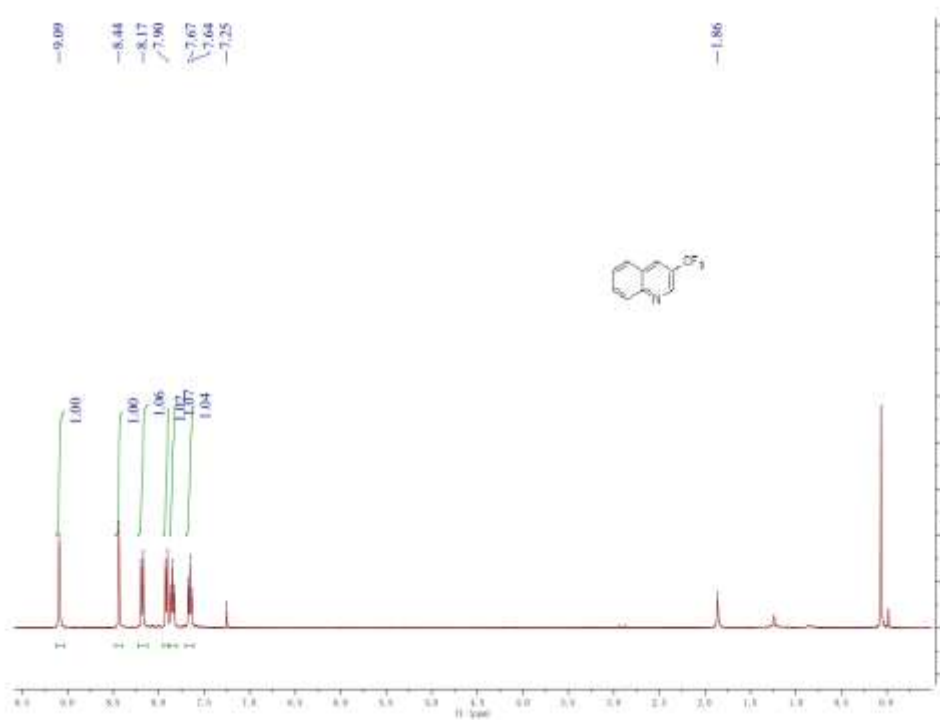

### <sup>19</sup>F NMR Spectrum of 3-(trifluoromethyl)quinoline (4h)

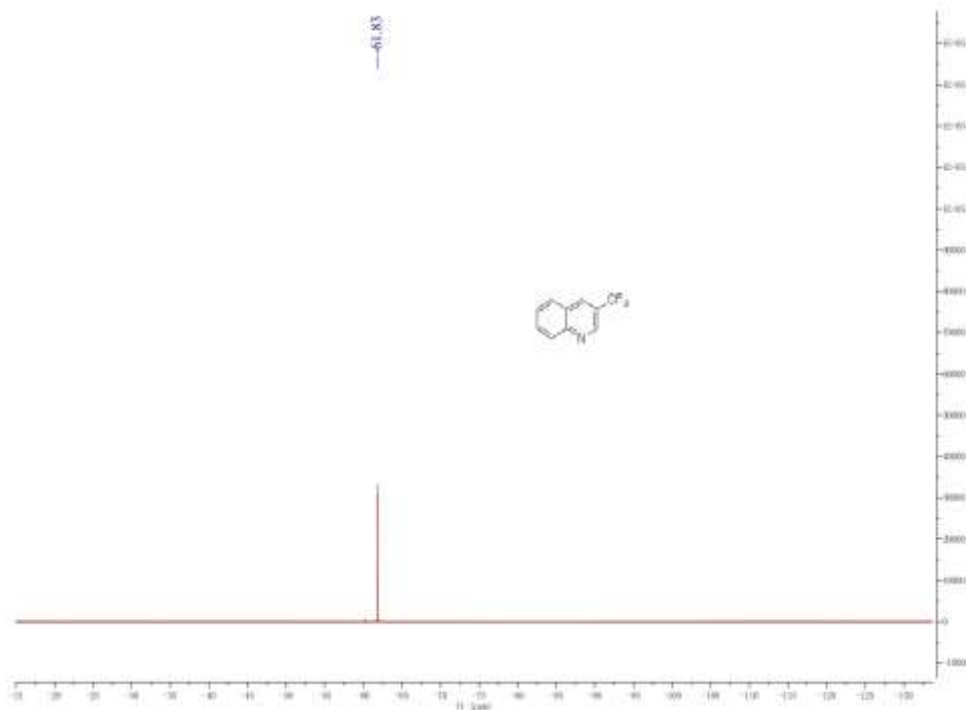

### <sup>13</sup>C NMR Spectrum of 3-(trifluoromethyl)quinoline (4h)

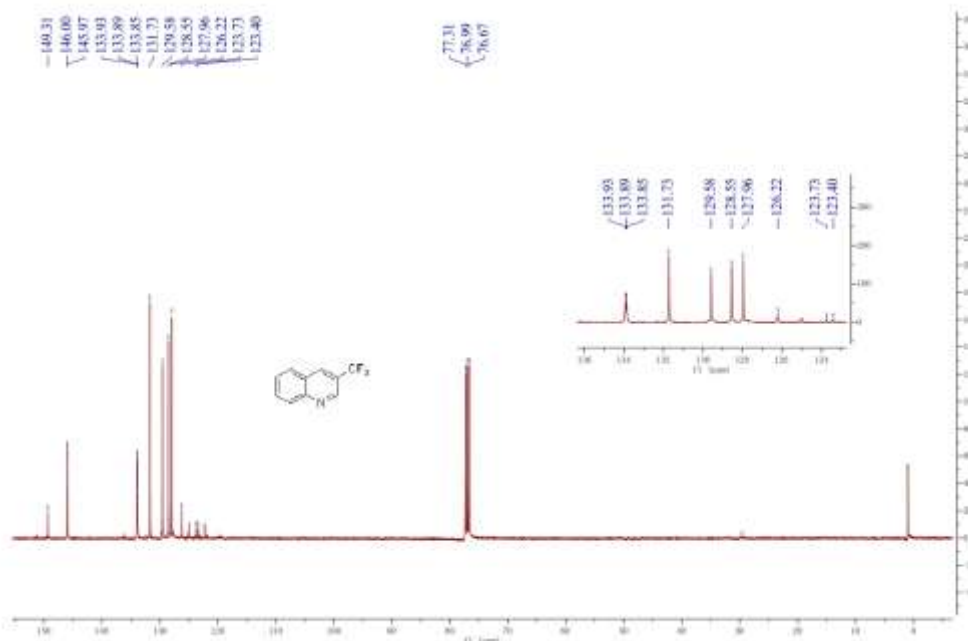

### <sup>1</sup>H NMR Spectrum of 8-(trifluoromethyl)quinoline (4i)

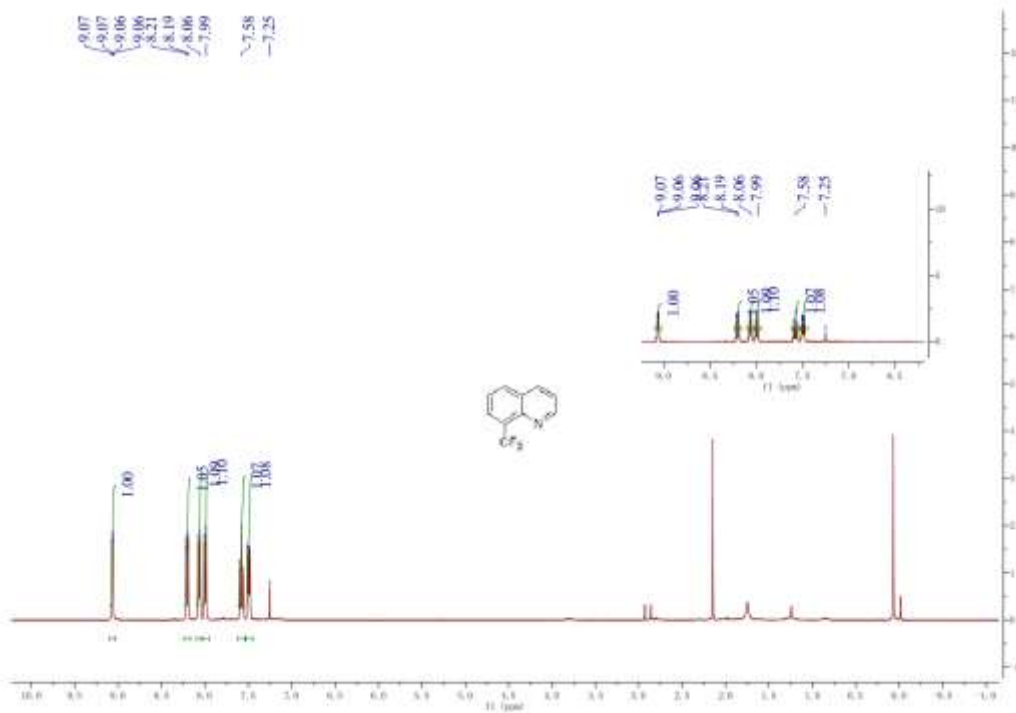

### <sup>19</sup>F NMR Spectrum of 8-(trifluoromethyl)quinoline (4i)

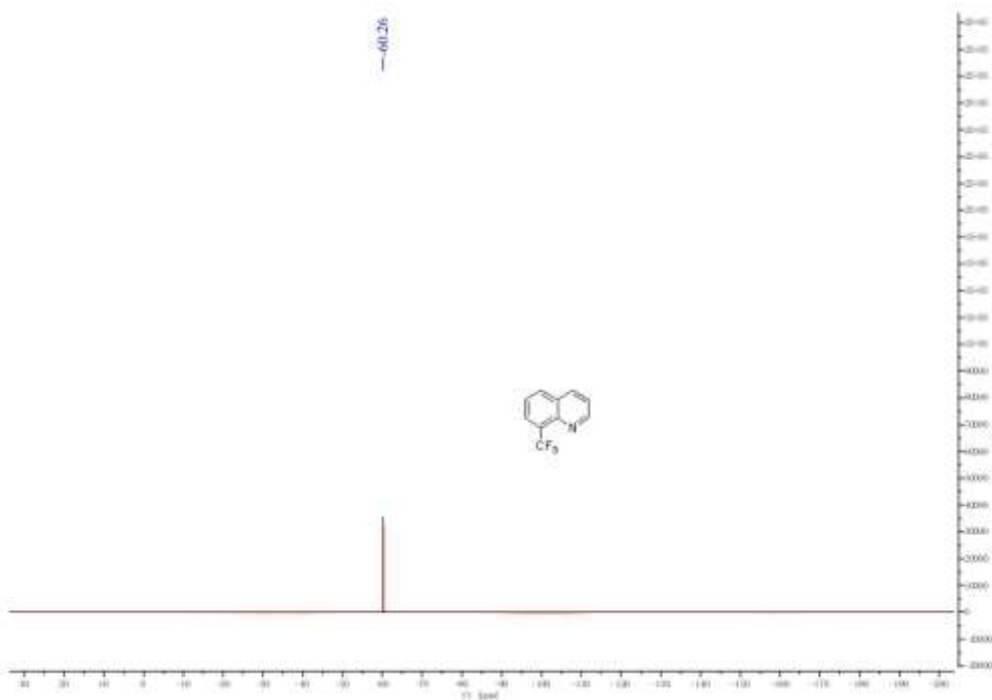



**<sup>13</sup>C NMR Spectrum of 8-(trifluoromethyl)quinoline (4i)**

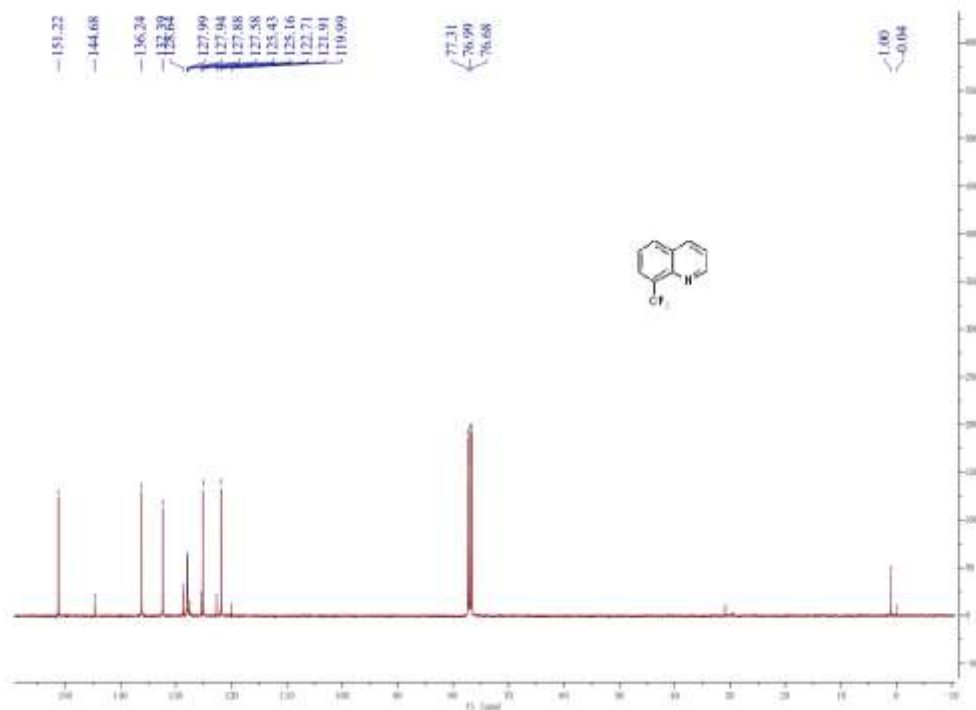

**<sup>19</sup>F NMR Spectrum of (3,3,3-Trifluoroprop-1-ene-1,1,2-triyl)tribenzene (4j)**

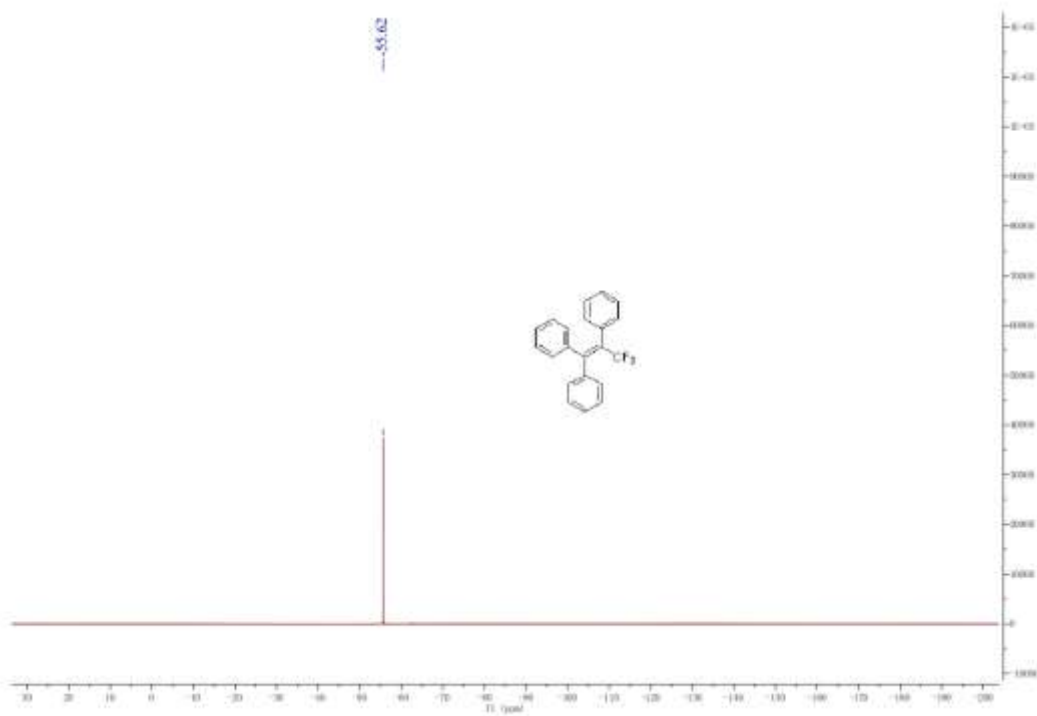

**<sup>1</sup>H NMR Spectrum of methyl4'-(2,2,2-trifluoroethyl)-[1,1'-biphenyl]-2-carboxylate (4k)**

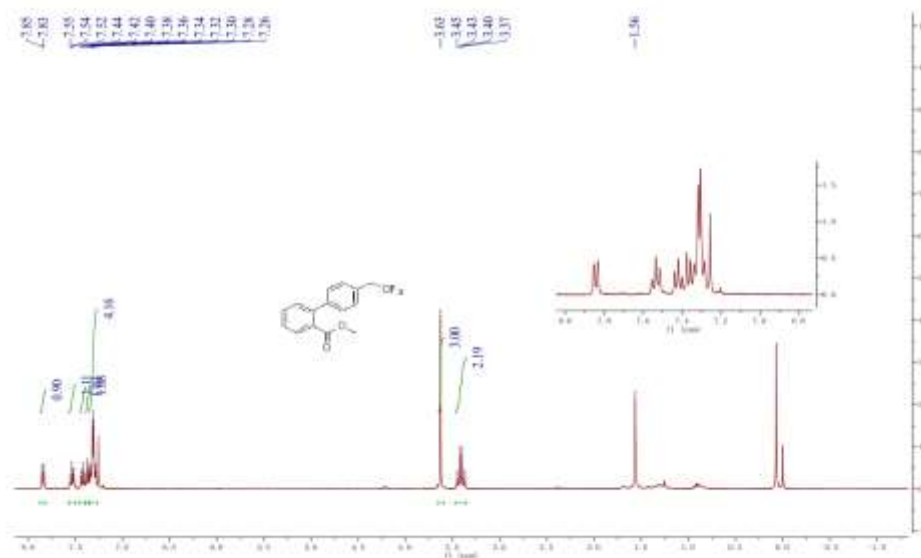

**<sup>19</sup>F NMR Spectrum of methyl4'-(2,2,2-trifluoroethyl)-[1,1'-biphenyl]-2-carboxylate (4k)**

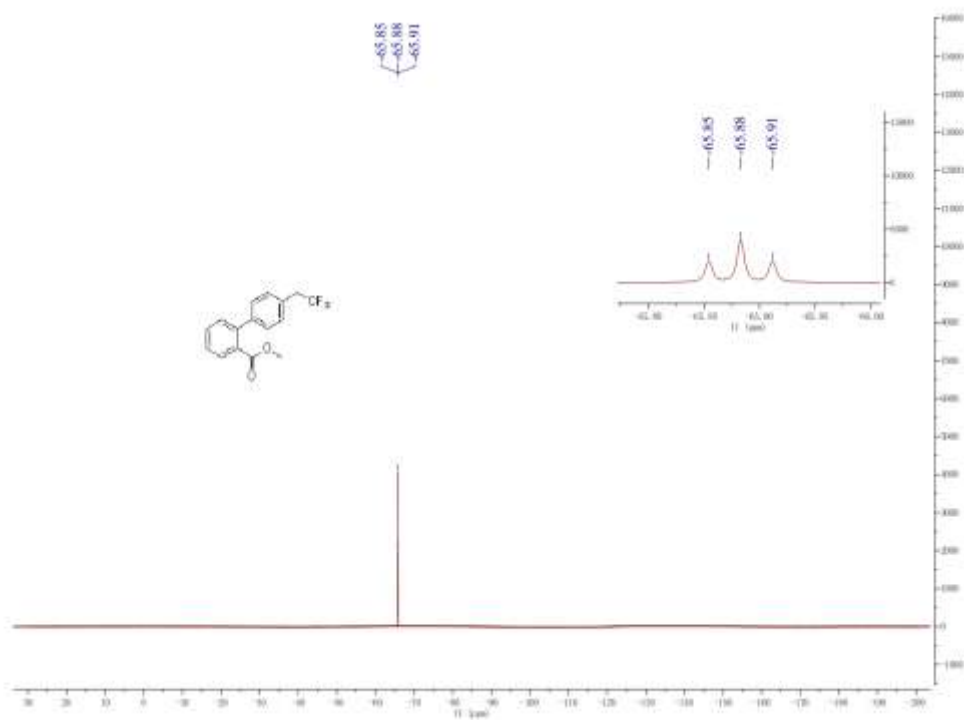

**<sup>13</sup>C NMR Spectrum of methyl 4'-(2,2,2-trifluoroethyl)-[1,1'-biphenyl]-2-carboxylate (4k)**

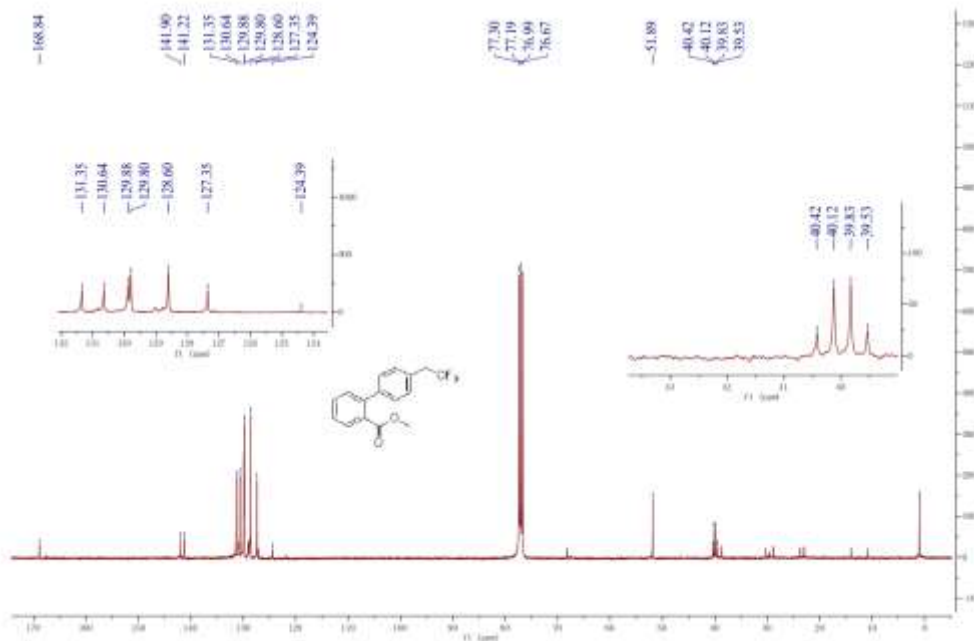

**<sup>1</sup>H NMR Spectrum of 4'-(2,2,2-trifluoroethyl)-[1,1'-biphenyl]-2-carbonitrile (4l)**

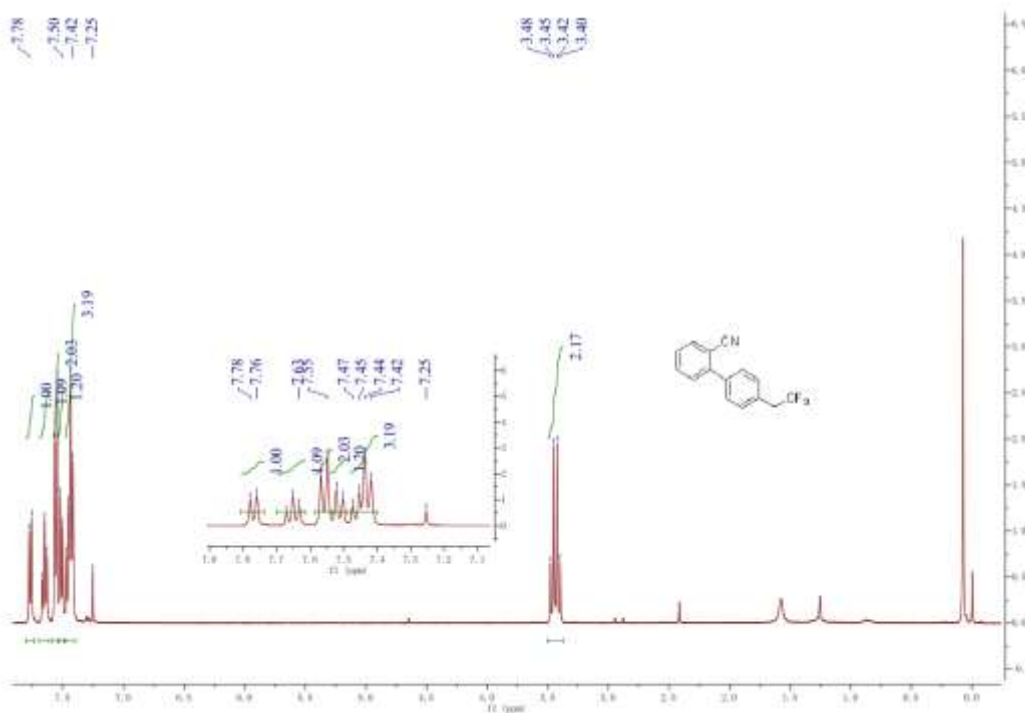

**<sup>19</sup>F NMR Spectrum of 4'-(2,2,2-trifluoroethyl)-[1,1'-biphenyl]-2-carbonitrile (41)**

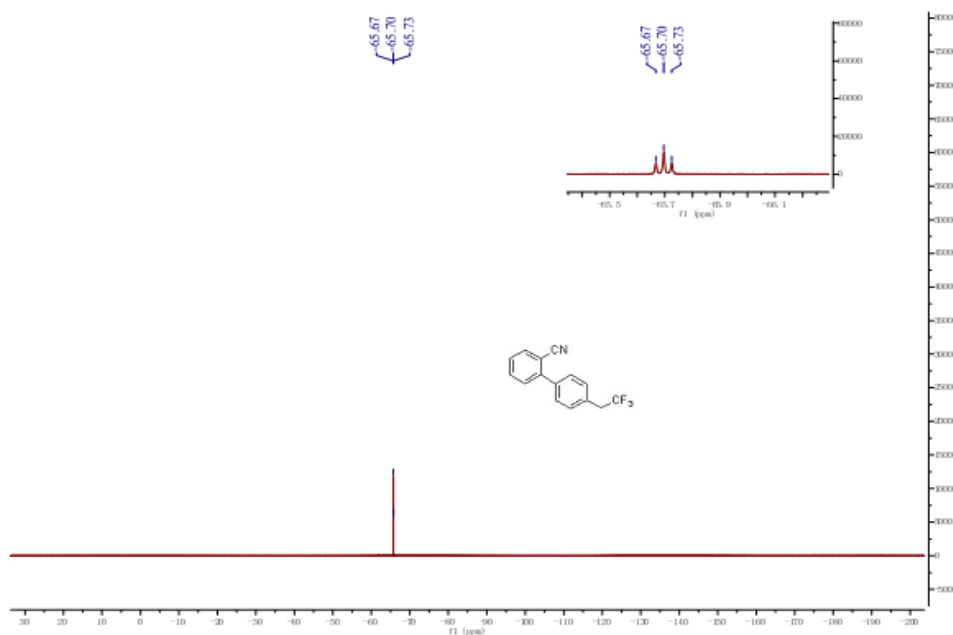

**<sup>13</sup>C NMR Spectrum of 4'-(2,2,2-trifluoroethyl)-[1,1'-biphenyl]-2-carbonitrile (41)**

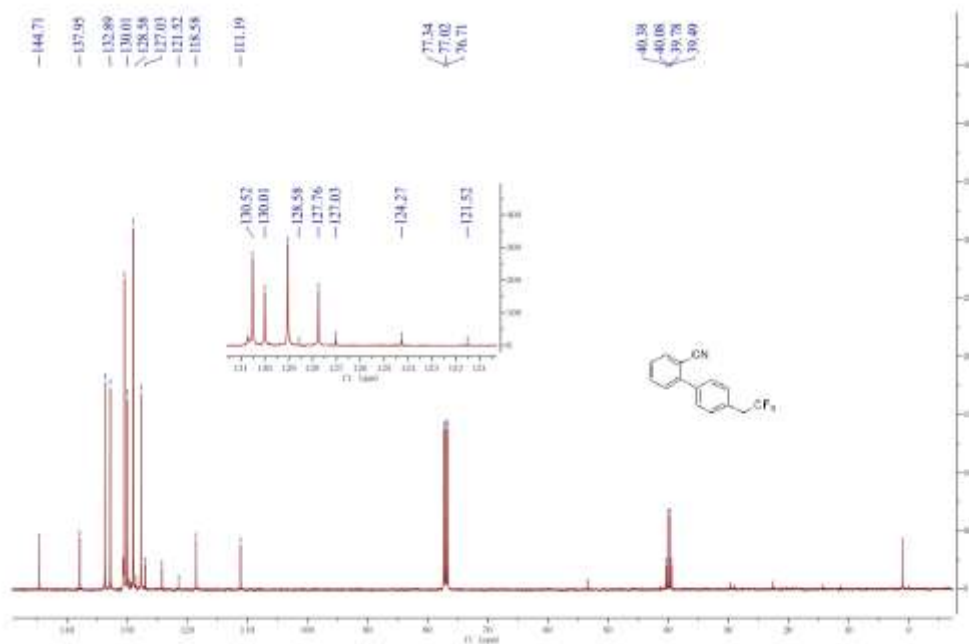

### <sup>1</sup>H NMR Spectrum of 2-(4,4,4-trifluorobutyl)isoindoline-1,3-dione (4m)

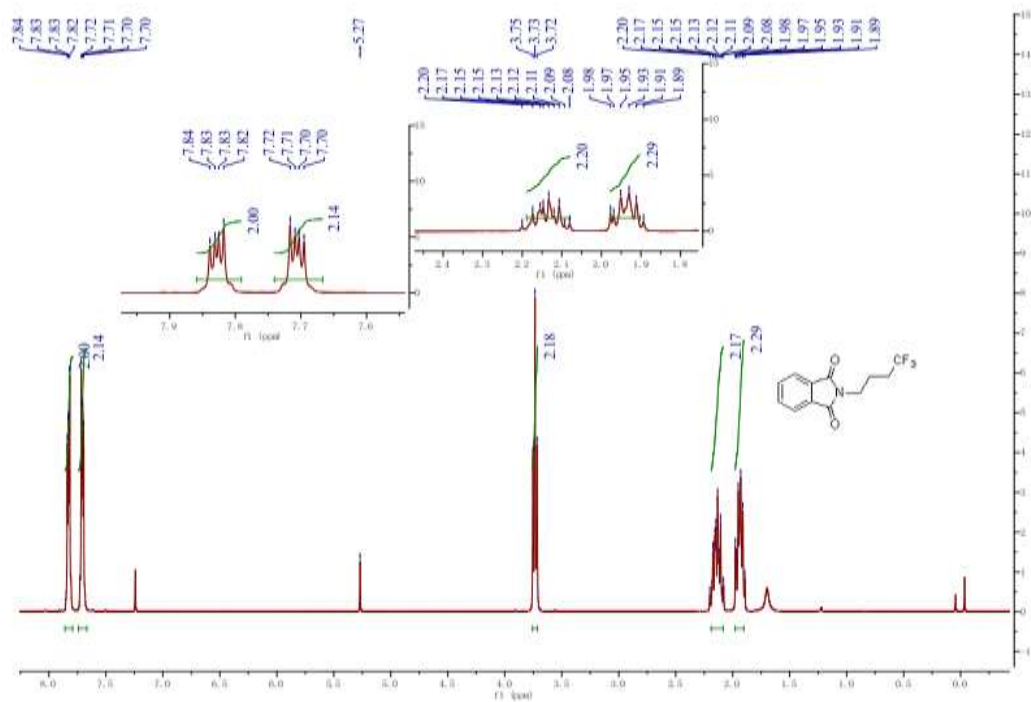

### <sup>19</sup>F NMR Spectrum of 2-(4,4,4-trifluorobutyl)isoindoline-1,3-dione (4m)

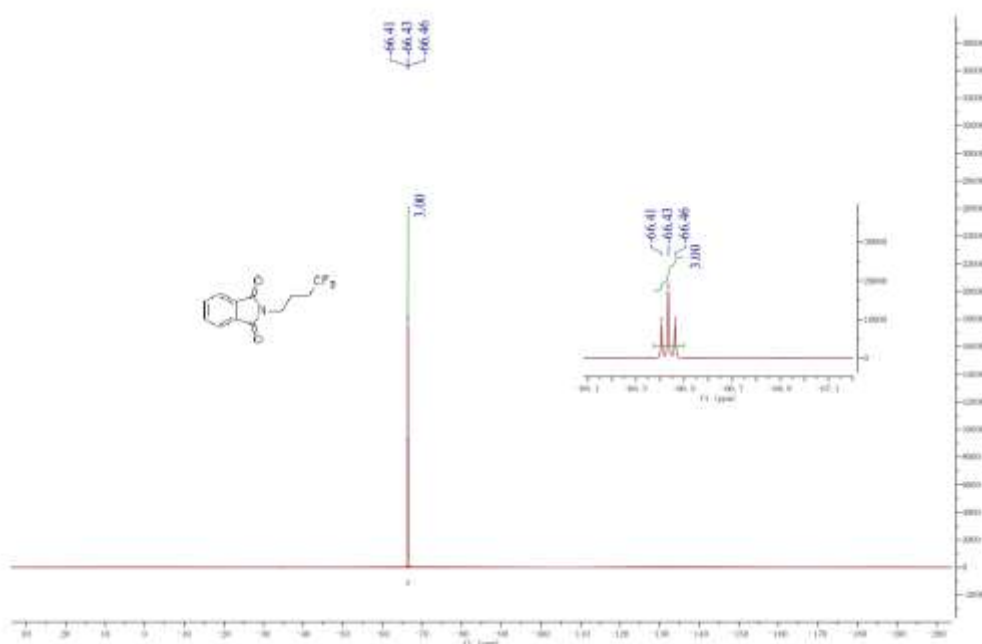

<sup>13</sup>C NMR Spectrum of 2-(4,4,4-trifluorobutyl)isoindoline-1,3-dione (4m)

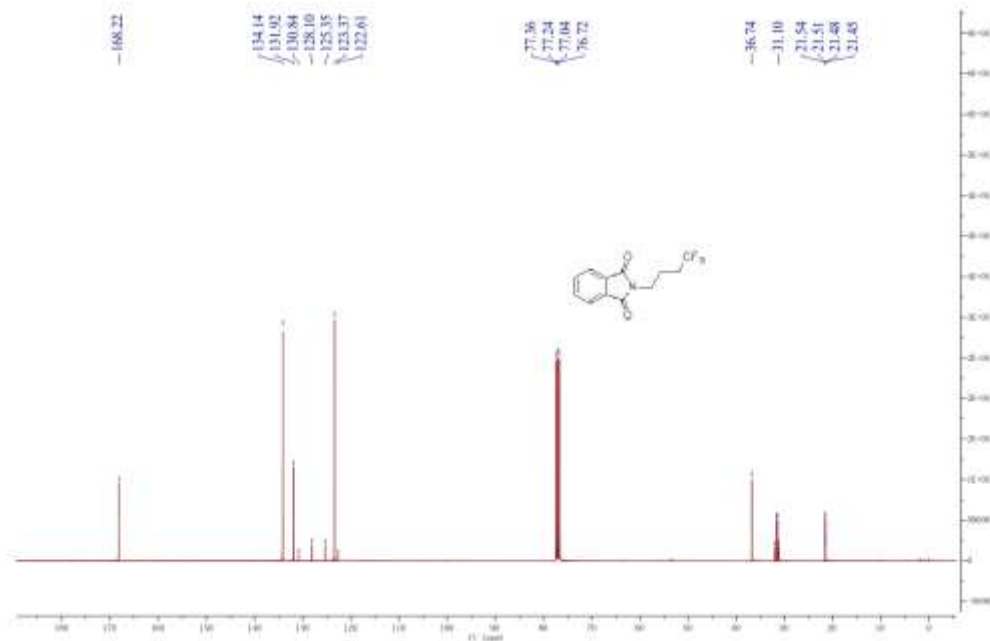

<sup>1</sup>H NMR Spectrum of 5-iodo-2-(4-methoxyphenoxy) pyridine (1b)

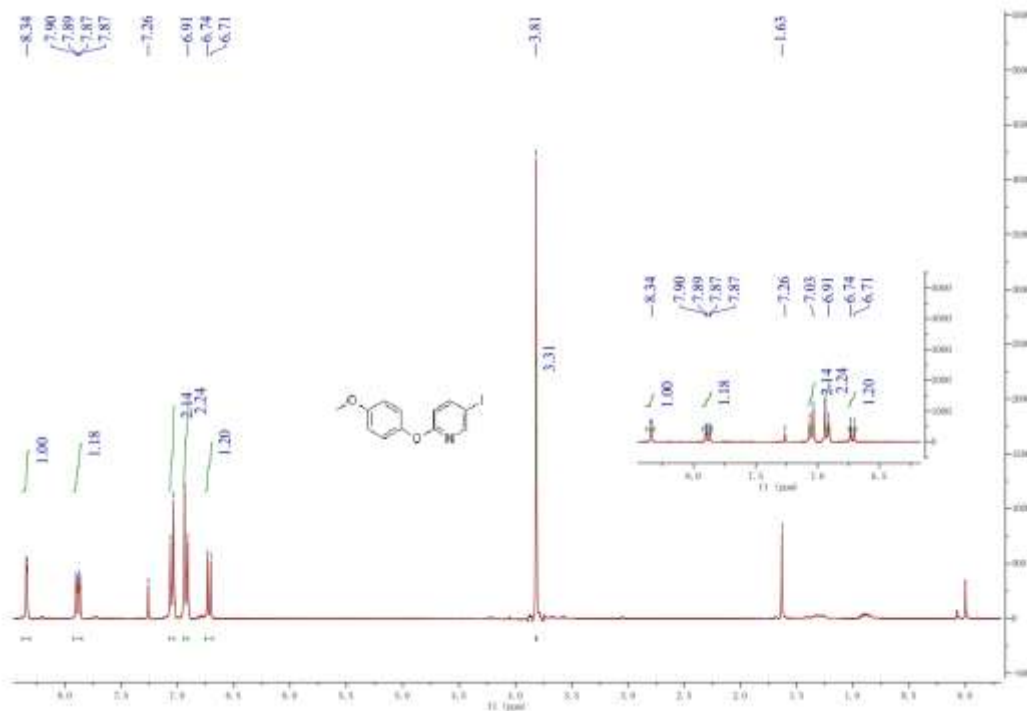

### <sup>13</sup>C NMR Spectrum of 5-iodo-2-(4-methoxyphenoxy)pyridine (1b)

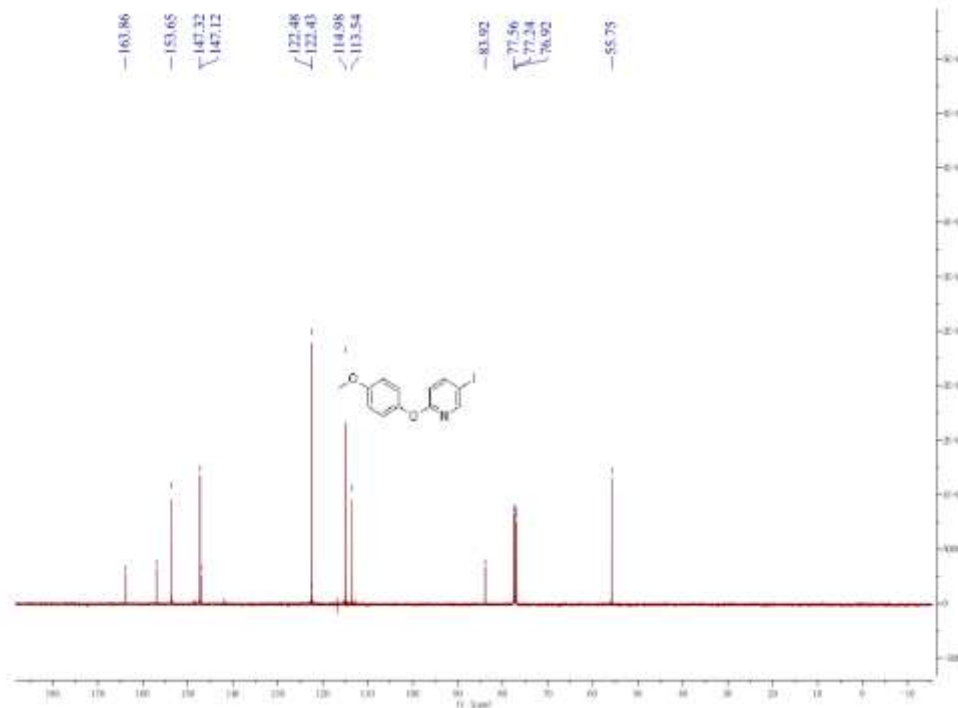

### <sup>1</sup>H NMR Spectrum of phenethyl 4-iodobenzoate (1c)

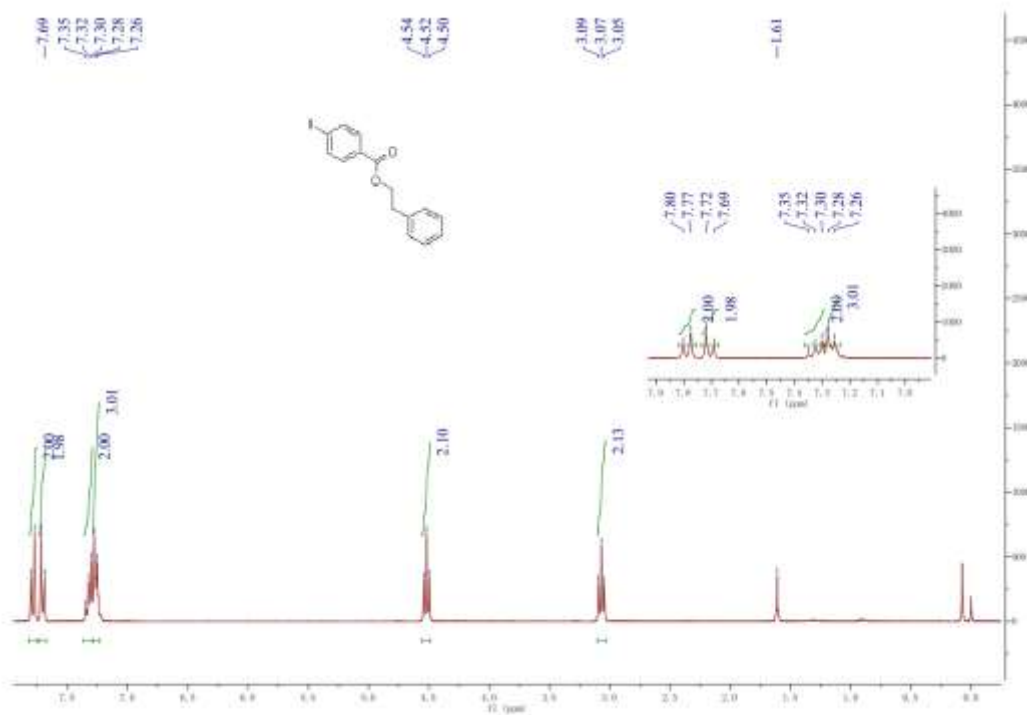

### $^{13}\text{C}$ NMR Spectrum of phenethyl 4-iodobenzoate (1c)

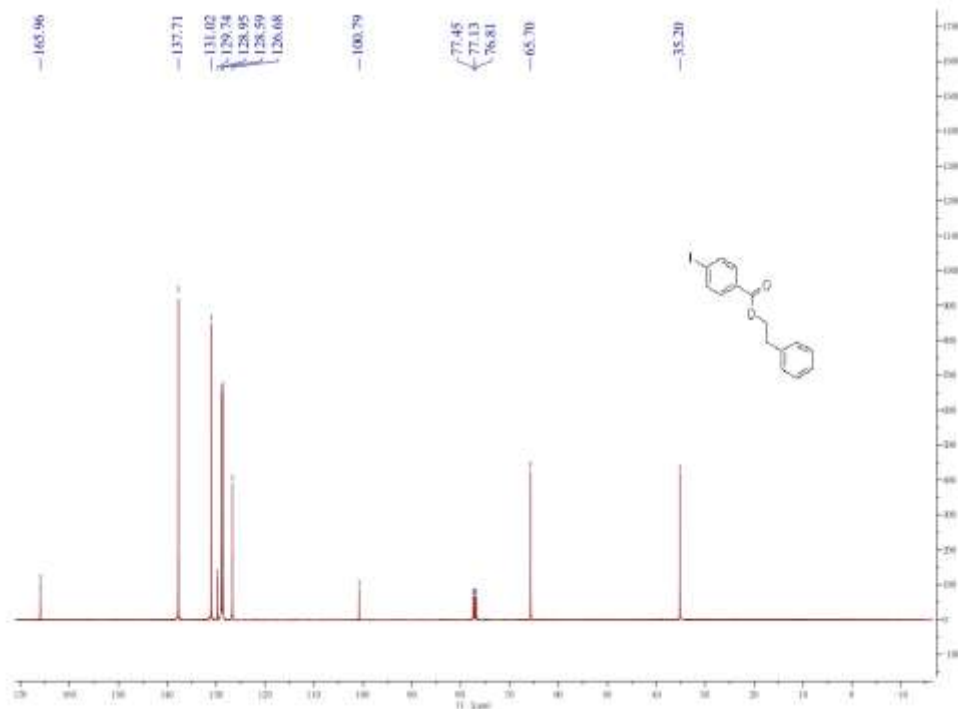

### $^1\text{H}$ NMR Spectrum of phenethyl 2-(4-iodophenyl)-2-methyl-1,3-dioxolane (1d)

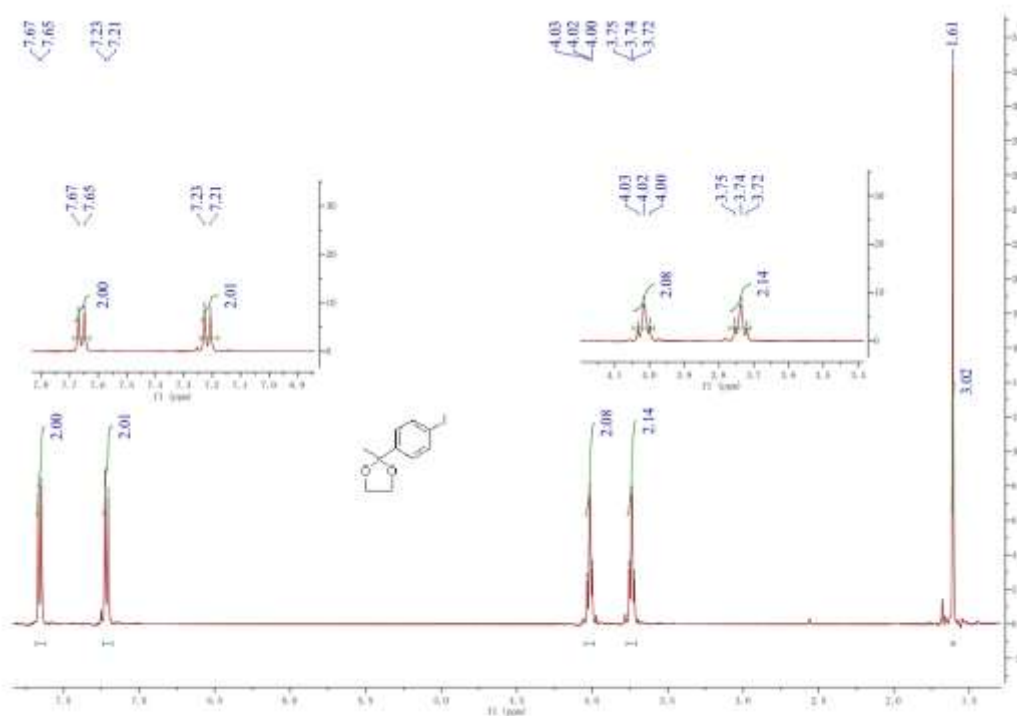



**<sup>13</sup>C NMR Spectrum of phenethyl 2-(4-iodophenyl)-2-methyl-1,3-dioxolane (1d)**

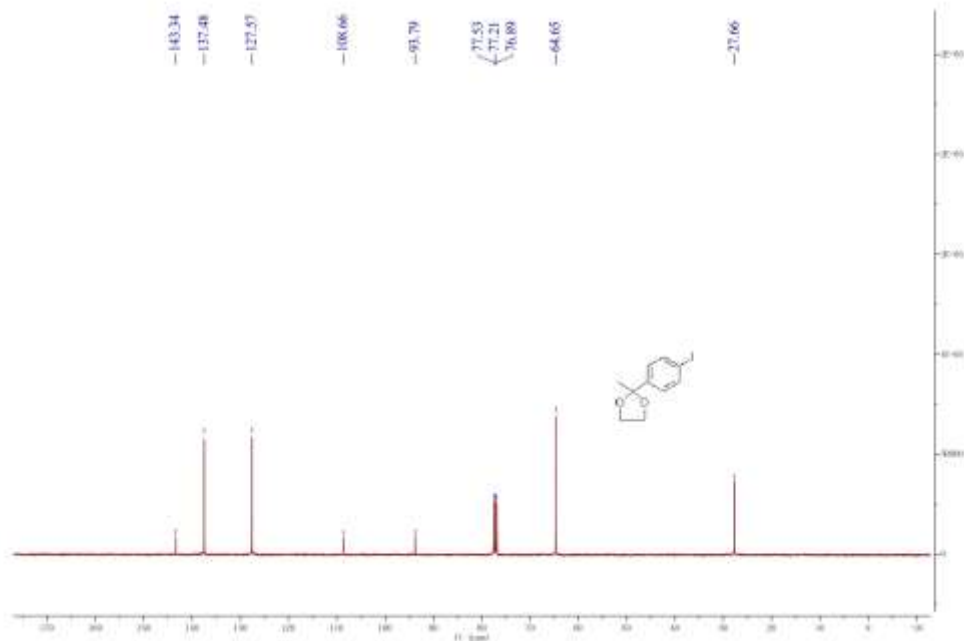

**<sup>1</sup>H NMR Spectrum of phenethyl 4-((4-iodophenoxy)methyl)benzotrile (1e)**

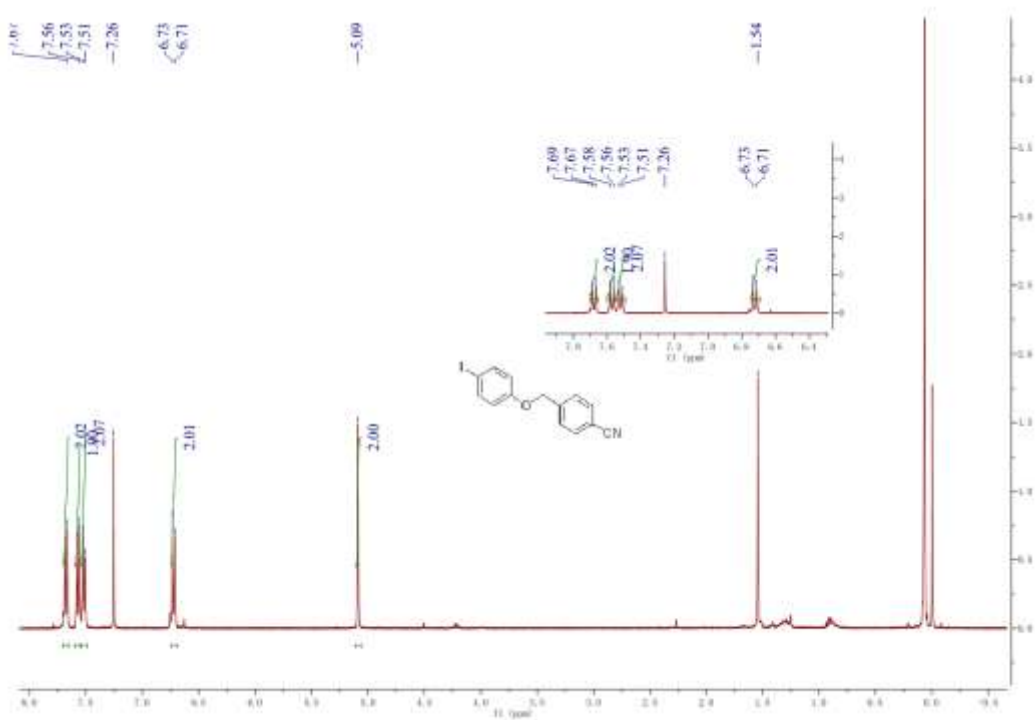

**<sup>13</sup>C NMR Spectrum of phenethyl 4-((4-iodophenoxy)methyl)benzonitrile (1e)**

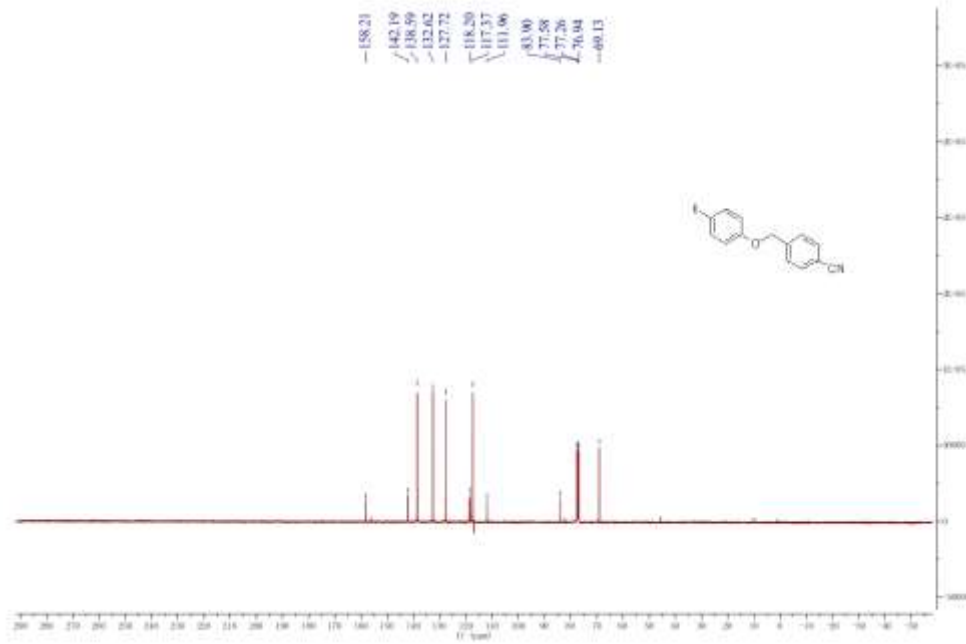

## Single crystals of bimetallic copper(II) species **8**

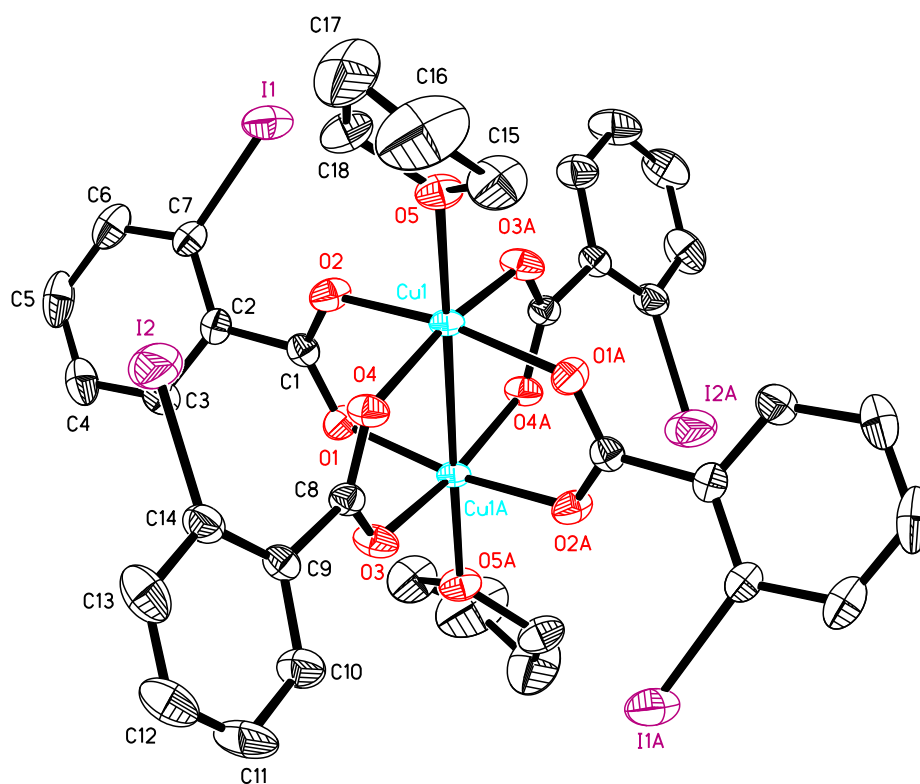

Table 1. Crystal data and structure refinement for cd214505.

|                        |                                                                                |                  |
|------------------------|--------------------------------------------------------------------------------|------------------|
| Identification code    | cd214505                                                                       |                  |
| Empirical formula      | C <sub>36</sub> H <sub>32</sub> Cu <sub>2</sub> I <sub>4</sub> O <sub>10</sub> |                  |
| Formula weight         | 1259.29                                                                        |                  |
| Temperature            | 293(2) K                                                                       |                  |
| Wavelength             | 0.71073 Å                                                                      |                  |
| Crystal system         | Triclinic                                                                      |                  |
| Space group            | P -1                                                                           |                  |
| Unit cell dimensions   | a = 8.6433(12) Å                                                               | α = 104.470(3) ° |
|                        | b = 11.2513(15) Å                                                              | β = 91.909(3) °  |
|                        | c = 21.811(3) Å                                                                | γ = 93.409(3) °  |
| Volume                 | 2047.7(5) Å <sup>3</sup>                                                       |                  |
| Z                      | 2                                                                              |                  |
| Density (calculated)   | 2.042 Mg/m <sup>3</sup>                                                        |                  |
| Absorption coefficient | 4.106 mm <sup>-1</sup>                                                         |                  |
| F(000)                 | 1196                                                                           |                  |
| Crystal size           | 0.211 x 0.134 x 0.112 mm <sup>3</sup>                                          |                  |

|                                   |                                             |
|-----------------------------------|---------------------------------------------|
| Theta range for data collection   | 0.965 to 26.000 °                           |
| Index ranges                      | -10<=h<=10, -9<=k<=13, -26<=l<=26           |
| Reflections collected             | 12508                                       |
| Independent reflections           | 8017 [R(int) = 0.0295]                      |
| Completeness to theta = 25.242 °  | 99.7 %                                      |
| Absorption correction             | Semi-empirical from equivalents             |
| Max. and min. transmission        | 0.7457 and 0.3852                           |
| Refinement method                 | Full-matrix least-squares on F <sup>2</sup> |
| Data / restraints / parameters    | 8017 / 12 / 487                             |
| Goodness-of-fit on F <sup>2</sup> | 1.037                                       |
| Final R indices [I>2sigma(I)]     | R1 = 0.0535, wR2 = 0.1552                   |
| R indices (all data)              | R1 = 0.0693, wR2 = 0.1691                   |
| Extinction coefficient            | n/a                                         |
| Largest diff. peak and hole       | 1.083 and -1.463 e.Å <sup>-3</sup>          |

Table 2. Bond lengths [Å] and angles [°] for cd214505.

---

|               |            |
|---------------|------------|
| Cu(1)-O(2)    | 1.951(4)   |
| Cu(1)-O(1)#1  | 1.951(4)   |
| Cu(1)-O(3)#1  | 1.952(4)   |
| Cu(1)-O(4)    | 1.968(4)   |
| Cu(1)-O(5)    | 2.172(4)   |
| Cu(1)-Cu(1)#1 | 2.6171(12) |
| Cu(2)-O(9)#2  | 1.958(4)   |
| Cu(2)-O(8)    | 1.961(4)   |
| Cu(2)-O(7)#2  | 1.965(4)   |
| Cu(2)-O(6)    | 1.966(4)   |
| Cu(2)-O(10)   | 2.138(4)   |
| Cu(2)-Cu(2)#2 | 2.6129(12) |
| I(1)-C(7)     | 2.077(7)   |
| I(3)-C(25)    | 2.075(6)   |
| I(2)-C(14)    | 2.070(7)   |
| I(4)-C(32)    | 2.123(7)   |
| I(2')-C(14)   | 2.139(8)   |
| I(4')-C(32)   | 2.130(7)   |
| O(1)-C(1)     | 1.242(7)   |
| O(1)-Cu(1)#1  | 1.951(4)   |
| O(2)-C(1)     | 1.262(7)   |
| O(3)-C(8)     | 1.262(7)   |

|              |           |
|--------------|-----------|
| O(3)-Cu(1)#1 | 1.952(4)  |
| O(4)-C(8)    | 1.247(7)  |
| O(5)-C(18)   | 1.435(9)  |
| O(5)-C(15)   | 1.440(9)  |
| O(6)-C(19)   | 1.236(7)  |
| O(7)-C(19)   | 1.240(7)  |
| O(7)-Cu(2)#2 | 1.965(4)  |
| O(8)-C(26)   | 1.247(7)  |
| O(9)-C(26)   | 1.243(7)  |
| O(9)-Cu(2)#2 | 1.958(4)  |
| O(10)-C(36)  | 1.405(10) |
| O(10)-C(33)  | 1.427(9)  |
| C(1)-C(2)    | 1.514(8)  |
| C(2)-C(3)    | 1.367(9)  |
| C(2)-C(7)    | 1.397(9)  |
| C(3)-C(4)    | 1.382(10) |
| C(3)-H(3)    | 0.9300    |
| C(4)-C(5)    | 1.341(13) |
| C(4)-H(4)    | 0.9300    |
| C(5)-C(6)    | 1.393(13) |
| C(5)-H(5)    | 0.9300    |
| C(6)-C(7)    | 1.394(10) |
| C(6)-H(6)    | 0.9300    |
| C(8)-C(9)    | 1.501(8)  |
| C(9)-C(14)   | 1.377(9)  |
| C(9)-C(10)   | 1.384(9)  |
| C(10)-C(11)  | 1.374(10) |
| C(10)-H(10)  | 0.9300    |
| C(11)-C(12)  | 1.352(13) |
| C(11)-H(11)  | 0.9300    |
| C(12)-C(13)  | 1.345(13) |
| C(12)-H(12)  | 0.9300    |
| C(13)-C(14)  | 1.401(10) |
| C(13)-H(13)  | 0.9300    |
| C(15)-C(16)  | 1.495(16) |
| C(15)-H(15A) | 0.9700    |
| C(15)-H(15B) | 0.9700    |
| C(16)-C(17)  | 1.457(18) |

|              |           |
|--------------|-----------|
| C(16)-H(16A) | 0.9700    |
| C(16)-H(16B) | 0.9700    |
| C(17)-C(18)  | 1.478(12) |
| C(17)-H(17A) | 0.9700    |
| C(17)-H(17B) | 0.9700    |
| C(18)-H(18A) | 0.9700    |
| C(18)-H(18B) | 0.9700    |
| C(19)-C(20)  | 1.513(7)  |
| C(20)-C(25)  | 1.383(8)  |
| C(20)-C(21)  | 1.402(9)  |
| C(21)-C(22)  | 1.374(10) |
| C(21)-H(21)  | 0.9300    |
| C(22)-C(23)  | 1.366(12) |
| C(22)-H(22)  | 0.9300    |
| C(23)-C(24)  | 1.360(12) |
| C(23)-H(23)  | 0.9300    |
| C(24)-C(25)  | 1.403(10) |
| C(24)-H(24)  | 0.9300    |
| C(26)-C(27)  | 1.512(8)  |
| C(27)-C(28)  | 1.364(9)  |
| C(27)-C(32)  | 1.380(9)  |
| C(28)-C(29)  | 1.366(10) |
| C(28)-H(28)  | 0.9300    |
| C(29)-C(30)  | 1.392(11) |
| C(29)-H(29)  | 0.9300    |
| C(30)-C(31)  | 1.350(11) |
| C(30)-H(30)  | 0.9300    |
| C(31)-C(32)  | 1.388(10) |
| C(31)-H(31)  | 0.9300    |
| C(33)-C(34)  | 1.470(11) |
| C(33)-H(33A) | 0.9700    |
| C(33)-H(33B) | 0.9700    |
| C(34)-C(35)  | 1.478(13) |
| C(34)-H(34A) | 0.9700    |
| C(34)-H(34B) | 0.9700    |
| C(35)-C(36)  | 1.467(14) |
| C(35)-H(35A) | 0.9700    |
| C(35)-H(35B) | 0.9700    |

|                      |            |
|----------------------|------------|
| C(36)-H(36A)         | 0.9700     |
| C(36)-H(36B)         | 0.9700     |
| O(2)-Cu(1)-O(1)#1    | 168.89(17) |
| O(2)-Cu(1)-O(3)#1    | 90.4(2)    |
| O(1)#1-Cu(1)-O(3)#1  | 89.2(2)    |
| O(2)-Cu(1)-O(4)      | 89.41(19)  |
| O(1)#1-Cu(1)-O(4)    | 88.86(19)  |
| O(3)#1-Cu(1)-O(4)    | 168.72(17) |
| O(2)-Cu(1)-O(5)      | 96.34(18)  |
| O(1)#1-Cu(1)-O(5)    | 94.72(18)  |
| O(3)#1-Cu(1)-O(5)    | 97.46(17)  |
| O(4)-Cu(1)-O(5)      | 93.77(17)  |
| O(2)-Cu(1)-Cu(1)#1   | 85.14(12)  |
| O(1)#1-Cu(1)-Cu(1)#1 | 83.76(12)  |
| O(3)#1-Cu(1)-Cu(1)#1 | 85.88(12)  |
| O(4)-Cu(1)-Cu(1)#1   | 82.87(12)  |
| O(5)-Cu(1)-Cu(1)#1   | 176.32(12) |
| O(9)#2-Cu(2)-O(8)    | 168.14(17) |
| O(9)#2-Cu(2)-O(7)#2  | 88.2(2)    |
| O(8)-Cu(2)-O(7)#2    | 89.31(19)  |
| O(9)#2-Cu(2)-O(6)    | 90.5(2)    |
| O(8)-Cu(2)-O(6)      | 89.58(19)  |
| O(7)#2-Cu(2)-O(6)    | 168.47(16) |
| O(9)#2-Cu(2)-O(10)   | 95.93(19)  |
| O(8)-Cu(2)-O(10)     | 95.85(19)  |
| O(7)#2-Cu(2)-O(10)   | 95.46(17)  |
| O(6)-Cu(2)-O(10)     | 96.07(18)  |
| O(9)#2-Cu(2)-Cu(2)#2 | 83.64(12)  |
| O(8)-Cu(2)-Cu(2)#2   | 84.55(12)  |
| O(7)#2-Cu(2)-Cu(2)#2 | 83.78(11)  |
| O(6)-Cu(2)-Cu(2)#2   | 84.69(11)  |
| O(10)-Cu(2)-Cu(2)#2  | 179.14(13) |
| C(1)-O(1)-Cu(1)#1    | 123.1(4)   |
| C(1)-O(2)-Cu(1)      | 121.0(4)   |
| C(8)-O(3)-Cu(1)#1    | 121.2(4)   |
| C(8)-O(4)-Cu(1)      | 124.3(4)   |
| C(18)-O(5)-C(15)     | 108.3(6)   |

|                    |          |
|--------------------|----------|
| C(18)-O(5)-Cu(1)   | 122.1(4) |
| C(15)-O(5)-Cu(1)   | 121.8(5) |
| C(19)-O(6)-Cu(2)   | 121.5(4) |
| C(19)-O(7)-Cu(2)#2 | 122.6(4) |
| C(26)-O(8)-Cu(2)   | 122.7(4) |
| C(26)-O(9)-Cu(2)#2 | 124.0(4) |
| C(36)-O(10)-C(33)  | 107.6(6) |
| C(36)-O(10)-Cu(2)  | 126.6(5) |
| C(33)-O(10)-Cu(2)  | 124.3(4) |
| O(1)-C(1)-O(2)     | 126.9(6) |
| O(1)-C(1)-C(2)     | 115.4(5) |
| O(2)-C(1)-C(2)     | 117.6(5) |
| C(3)-C(2)-C(7)     | 118.8(6) |
| C(3)-C(2)-C(1)     | 116.9(6) |
| C(7)-C(2)-C(1)     | 124.3(5) |
| C(2)-C(3)-C(4)     | 121.3(7) |
| C(2)-C(3)-H(3)     | 119.4    |
| C(4)-C(3)-H(3)     | 119.4    |
| C(5)-C(4)-C(3)     | 120.1(7) |
| C(5)-C(4)-H(4)     | 120.0    |
| C(3)-C(4)-H(4)     | 120.0    |
| C(4)-C(5)-C(6)     | 121.0(7) |
| C(4)-C(5)-H(5)     | 119.5    |
| C(6)-C(5)-H(5)     | 119.5    |
| C(5)-C(6)-C(7)     | 119.0(8) |
| C(5)-C(6)-H(6)     | 120.5    |
| C(7)-C(6)-H(6)     | 120.5    |
| C(6)-C(7)-C(2)     | 119.8(6) |
| C(6)-C(7)-I(1)     | 115.9(5) |
| C(2)-C(7)-I(1)     | 124.1(5) |
| O(4)-C(8)-O(3)     | 125.7(5) |
| O(4)-C(8)-C(9)     | 117.9(5) |
| O(3)-C(8)-C(9)     | 116.3(5) |
| C(14)-C(9)-C(10)   | 117.7(6) |
| C(14)-C(9)-C(8)    | 124.7(5) |
| C(10)-C(9)-C(8)    | 117.5(6) |
| C(11)-C(10)-C(9)   | 121.2(8) |
| C(11)-C(10)-H(10)  | 119.4    |



|                     |           |
|---------------------|-----------|
| C(9)-C(10)-H(10)    | 119.4     |
| C(12)-C(11)-C(10)   | 120.3(8)  |
| C(12)-C(11)-H(11)   | 119.8     |
| C(10)-C(11)-H(11)   | 119.8     |
| C(13)-C(12)-C(11)   | 120.0(7)  |
| C(13)-C(12)-H(12)   | 120.0     |
| C(11)-C(12)-H(12)   | 120.0     |
| C(12)-C(13)-C(14)   | 120.7(8)  |
| C(12)-C(13)-H(13)   | 119.7     |
| C(14)-C(13)-H(13)   | 119.7     |
| C(9)-C(14)-C(13)    | 119.9(7)  |
| C(9)-C(14)-I(2)     | 126.5(4)  |
| C(13)-C(14)-I(2)    | 113.3(6)  |
| C(9)-C(14)-I(2')    | 120.3(5)  |
| C(13)-C(14)-I(2')   | 118.4(6)  |
| O(5)-C(15)-C(16)    | 105.8(9)  |
| O(5)-C(15)-H(15A)   | 110.6     |
| C(16)-C(15)-H(15A)  | 110.6     |
| O(5)-C(15)-H(15B)   | 110.6     |
| C(16)-C(15)-H(15B)  | 110.6     |
| H(15A)-C(15)-H(15B) | 108.7     |
| C(17)-C(16)-C(15)   | 104.8(10) |
| C(17)-C(16)-H(16A)  | 110.8     |
| C(15)-C(16)-H(16A)  | 110.8     |
| C(17)-C(16)-H(16B)  | 110.8     |
| C(15)-C(16)-H(16B)  | 110.8     |
| H(16A)-C(16)-H(16B) | 108.9     |
| C(16)-C(17)-C(18)   | 104.5(9)  |
| C(16)-C(17)-H(17A)  | 110.9     |
| C(18)-C(17)-H(17A)  | 110.9     |
| C(16)-C(17)-H(17B)  | 110.9     |
| C(18)-C(17)-H(17B)  | 110.9     |
| H(17A)-C(17)-H(17B) | 108.9     |
| O(5)-C(18)-C(17)    | 107.6(7)  |
| O(5)-C(18)-H(18A)   | 110.2     |
| C(17)-C(18)-H(18A)  | 110.2     |
| O(5)-C(18)-H(18B)   | 110.2     |
| C(17)-C(18)-H(18B)  | 110.2     |

|                     |          |
|---------------------|----------|
| H(18A)-C(18)-H(18B) | 108.5    |
| O(6)-C(19)-O(7)     | 127.2(5) |
| O(6)-C(19)-C(20)    | 117.6(5) |
| O(7)-C(19)-C(20)    | 115.1(5) |
| C(25)-C(20)-C(21)   | 118.7(5) |
| C(25)-C(20)-C(19)   | 124.3(5) |
| C(21)-C(20)-C(19)   | 116.9(5) |
| C(22)-C(21)-C(20)   | 120.4(6) |
| C(22)-C(21)-H(21)   | 119.8    |
| C(20)-C(21)-H(21)   | 119.8    |
| C(23)-C(22)-C(21)   | 119.8(7) |
| C(23)-C(22)-H(22)   | 120.1    |
| C(21)-C(22)-H(22)   | 120.1    |
| C(24)-C(23)-C(22)   | 121.5(7) |
| C(24)-C(23)-H(23)   | 119.2    |
| C(22)-C(23)-H(23)   | 119.2    |
| C(23)-C(24)-C(25)   | 119.4(7) |
| C(23)-C(24)-H(24)   | 120.3    |
| C(25)-C(24)-H(24)   | 120.3    |
| C(20)-C(25)-C(24)   | 120.1(6) |
| C(20)-C(25)-I(3)    | 121.6(5) |
| C(24)-C(25)-I(3)    | 118.3(5) |
| O(9)-C(26)-O(8)     | 125.1(5) |
| O(9)-C(26)-C(27)    | 116.7(5) |
| O(8)-C(26)-C(27)    | 118.2(5) |
| C(28)-C(27)-C(32)   | 117.4(6) |
| C(28)-C(27)-C(26)   | 116.9(5) |
| C(32)-C(27)-C(26)   | 125.7(5) |
| C(27)-C(28)-C(29)   | 123.2(7) |
| C(27)-C(28)-H(28)   | 118.4    |
| C(29)-C(28)-H(28)   | 118.4    |
| C(28)-C(29)-C(30)   | 118.8(7) |
| C(28)-C(29)-H(29)   | 120.6    |
| C(30)-C(29)-H(29)   | 120.6    |
| C(31)-C(30)-C(29)   | 118.7(6) |
| C(31)-C(30)-H(30)   | 120.7    |
| C(29)-C(30)-H(30)   | 120.7    |
| C(30)-C(31)-C(32)   | 121.7(7) |

|                     |          |
|---------------------|----------|
| C(30)-C(31)-H(31)   | 119.1    |
| C(32)-C(31)-H(31)   | 119.1    |
| C(27)-C(32)-C(31)   | 119.8(7) |
| C(27)-C(32)-I(4)    | 124.9(5) |
| C(31)-C(32)-I(4)    | 114.3(6) |
| C(27)-C(32)-I(4')   | 123.1(5) |
| C(31)-C(32)-I(4')   | 113.4(6) |
| O(10)-C(33)-C(34)   | 107.2(7) |
| O(10)-C(33)-H(33A)  | 110.3    |
| C(34)-C(33)-H(33A)  | 110.3    |
| O(10)-C(33)-H(33B)  | 110.3    |
| C(34)-C(33)-H(33B)  | 110.3    |
| H(33A)-C(33)-H(33B) | 108.5    |
| C(33)-C(34)-C(35)   | 106.2(7) |
| C(33)-C(34)-H(34A)  | 110.5    |
| C(35)-C(34)-H(34A)  | 110.5    |
| C(33)-C(34)-H(34B)  | 110.5    |
| C(35)-C(34)-H(34B)  | 110.5    |
| H(34A)-C(34)-H(34B) | 108.7    |
| C(36)-C(35)-C(34)   | 102.8(8) |
| C(36)-C(35)-H(35A)  | 111.2    |
| C(34)-C(35)-H(35A)  | 111.2    |
| C(36)-C(35)-H(35B)  | 111.2    |
| C(34)-C(35)-H(35B)  | 111.2    |
| H(35A)-C(35)-H(35B) | 109.1    |
| O(10)-C(36)-C(35)   | 107.3(8) |
| O(10)-C(36)-H(36A)  | 110.3    |
| C(35)-C(36)-H(36A)  | 110.3    |
| O(10)-C(36)-H(36B)  | 110.3    |
| C(35)-C(36)-H(36B)  | 110.3    |
| H(36A)-C(36)-H(36B) | 108.5    |

---

Symmetry transformations used to generate equivalent atoms:

#1 -x+1,-y+1,-z+2      #2 -x,-y+1,-z+1

Table 3. Torsion angles [ ° ] for cd214505.

---

|                        |        |
|------------------------|--------|
| Cu(1)#1-O(1)-C(1)-O(2) | 1.6(8) |
|------------------------|--------|

|                         |           |
|-------------------------|-----------|
| Cu(1)#1-O(1)-C(1)-C(2)  | -176.0(3) |
| Cu(1)-O(2)-C(1)-O(1)    | -1.0(8)   |
| Cu(1)-O(2)-C(1)-C(2)    | 176.5(4)  |
| O(1)-C(1)-C(2)-C(3)     | 36.1(7)   |
| O(2)-C(1)-C(2)-C(3)     | -141.7(6) |
| O(1)-C(1)-C(2)-C(7)     | -145.5(6) |
| O(2)-C(1)-C(2)-C(7)     | 36.7(8)   |
| C(7)-C(2)-C(3)-C(4)     | -1.6(10)  |
| C(1)-C(2)-C(3)-C(4)     | 176.9(6)  |
| C(2)-C(3)-C(4)-C(5)     | 2.9(11)   |
| C(3)-C(4)-C(5)-C(6)     | -0.8(12)  |
| C(4)-C(5)-C(6)-C(7)     | -2.5(12)  |
| C(5)-C(6)-C(7)-C(2)     | 3.7(10)   |
| C(5)-C(6)-C(7)-I(1)     | 179.0(6)  |
| C(3)-C(2)-C(7)-C(6)     | -1.7(9)   |
| C(1)-C(2)-C(7)-C(6)     | 179.9(6)  |
| C(3)-C(2)-C(7)-I(1)     | -176.6(5) |
| C(1)-C(2)-C(7)-I(1)     | 5.0(8)    |
| Cu(1)-O(4)-C(8)-O(3)    | 3.0(9)    |
| Cu(1)-O(4)-C(8)-C(9)    | -179.7(4) |
| Cu(1)#1-O(3)-C(8)-O(4)  | -1.8(9)   |
| Cu(1)#1-O(3)-C(8)-C(9)  | -179.2(4) |
| O(4)-C(8)-C(9)-C(14)    | 29.9(9)   |
| O(3)-C(8)-C(9)-C(14)    | -152.5(6) |
| O(4)-C(8)-C(9)-C(10)    | -145.9(6) |
| O(3)-C(8)-C(9)-C(10)    | 31.8(8)   |
| C(14)-C(9)-C(10)-C(11)  | -0.3(11)  |
| C(8)-C(9)-C(10)-C(11)   | 175.7(8)  |
| C(9)-C(10)-C(11)-C(12)  | -2.4(15)  |
| C(10)-C(11)-C(12)-C(13) | 4.1(16)   |
| C(11)-C(12)-C(13)-C(14) | -3.1(15)  |
| C(10)-C(9)-C(14)-C(13)  | 1.4(10)   |
| C(8)-C(9)-C(14)-C(13)   | -174.4(6) |
| C(10)-C(9)-C(14)-I(2)   | 175.8(5)  |
| C(8)-C(9)-C(14)-I(2)    | 0.1(10)   |
| C(10)-C(9)-C(14)-I(2')  | -165.2(5) |
| C(8)-C(9)-C(14)-I(2')   | 19.0(9)   |
| C(12)-C(13)-C(14)-C(9)  | 0.3(12)   |

|                          |           |
|--------------------------|-----------|
| C(12)-C(13)-C(14)-I(2)   | -174.8(7) |
| C(12)-C(13)-C(14)-I(2')  | 167.2(7)  |
| C(18)-O(5)-C(15)-C(16)   | 13.4(11)  |
| Cu(1)-O(5)-C(15)-C(16)   | -136.2(8) |
| O(5)-C(15)-C(16)-C(17)   | -27.2(14) |
| C(15)-C(16)-C(17)-C(18)  | 30.0(15)  |
| C(15)-O(5)-C(18)-C(17)   | 5.3(10)   |
| Cu(1)-O(5)-C(18)-C(17)   | 154.9(7)  |
| C(16)-C(17)-C(18)-O(5)   | -22.4(14) |
| Cu(2)-O(6)-C(19)-O(7)    | 5.0(8)    |
| Cu(2)-O(6)-C(19)-C(20)   | -176.6(4) |
| Cu(2)#2-O(7)-C(19)-O(6)  | -5.1(8)   |
| Cu(2)#2-O(7)-C(19)-C(20) | 176.4(4)  |
| O(6)-C(19)-C(20)-C(25)   | 55.9(8)   |
| O(7)-C(19)-C(20)-C(25)   | -125.5(6) |
| O(6)-C(19)-C(20)-C(21)   | -125.8(6) |
| O(7)-C(19)-C(20)-C(21)   | 52.9(7)   |
| C(25)-C(20)-C(21)-C(22)  | -1.3(10)  |
| C(19)-C(20)-C(21)-C(22)  | -179.7(7) |
| C(20)-C(21)-C(22)-C(23)  | 1.9(13)   |
| C(21)-C(22)-C(23)-C(24)  | -2.0(15)  |
| C(22)-C(23)-C(24)-C(25)  | 1.5(14)   |
| C(21)-C(20)-C(25)-C(24)  | 0.8(10)   |
| C(19)-C(20)-C(25)-C(24)  | 179.1(6)  |
| C(21)-C(20)-C(25)-I(3)   | -176.2(5) |
| C(19)-C(20)-C(25)-I(3)   | 2.1(8)    |
| C(23)-C(24)-C(25)-C(20)  | -0.9(12)  |
| C(23)-C(24)-C(25)-I(3)   | 176.2(7)  |
| Cu(2)#2-O(9)-C(26)-O(8)  | -0.3(9)   |
| Cu(2)#2-O(9)-C(26)-C(27) | 178.8(4)  |
| Cu(2)-O(8)-C(26)-O(9)    | -1.4(8)   |
| Cu(2)-O(8)-C(26)-C(27)   | 179.5(4)  |
| O(9)-C(26)-C(27)-C(28)   | 1.6(8)    |
| O(8)-C(26)-C(27)-C(28)   | -179.2(6) |
| O(9)-C(26)-C(27)-C(32)   | -178.5(7) |
| O(8)-C(26)-C(27)-C(32)   | 0.7(10)   |
| C(32)-C(27)-C(28)-C(29)  | 3.7(11)   |
| C(26)-C(27)-C(28)-C(29)  | -176.4(7) |

|                         |           |
|-------------------------|-----------|
| C(27)-C(28)-C(29)-C(30) | -2.3(12)  |
| C(28)-C(29)-C(30)-C(31) | 2.4(14)   |
| C(29)-C(30)-C(31)-C(32) | -4.2(15)  |
| C(28)-C(27)-C(32)-C(31) | -5.2(12)  |
| C(26)-C(27)-C(32)-C(31) | 174.9(8)  |
| C(28)-C(27)-C(32)-I(4)  | 163.2(6)  |
| C(26)-C(27)-C(32)-I(4)  | -16.7(11) |
| C(28)-C(27)-C(32)-I(4') | -162.2(6) |
| C(26)-C(27)-C(32)-I(4') | 17.9(11)  |
| C(30)-C(31)-C(32)-C(27) | 5.7(15)   |
| C(30)-C(31)-C(32)-I(4)  | -163.9(8) |
| C(30)-C(31)-C(32)-I(4') | 164.7(8)  |
| C(36)-O(10)-C(33)-C(34) | 10.2(13)  |
| Cu(2)-O(10)-C(33)-C(34) | -156.7(7) |
| O(10)-C(33)-C(34)-C(35) | 8.9(12)   |
| C(33)-C(34)-C(35)-C(36) | -23.5(13) |
| C(33)-O(10)-C(36)-C(35) | -25.8(14) |
| Cu(2)-O(10)-C(36)-C(35) | 140.7(7)  |
| C(34)-C(35)-C(36)-O(10) | 30.4(14)  |

---

Symmetry transformations used to generate equivalent atoms:

#1 -x+1,-y+1,-z+2      #2 -x,-y+1,-z+1
